# Supplementary material
Source: MDPI journal article supplement (https://www.mdpi.com/2073-4441/14/4/585)
Supplement: s1 [file s1]

## Article

# Passive Sampling with Active Carbon Fibres in the Determination of Organic Pollutants in Groundwater

Primož Auersperger<sup>1</sup>, Anja Koroša<sup>2,\*</sup>, Nina Mali<sup>2</sup> and Brigita Jamnik<sup>1</sup>

## Supplementary Materials

**Table S1.** List of contaminants detected in groundwater by ACF passive samplers.

| tr, min | Compound                      | CAS        | t.i./c.i. | Source / explanation                                                 |
|---------|-------------------------------|------------|-----------|----------------------------------------------------------------------|
| 3.1     | 2-pentanone                   | 107-87-9   | t.i.      | flavors, solvent, cosmetics                                          |
| 3.3     | vinyl acetate                 | 108-05-4   | t.i.      | monomer, solvent                                                     |
| 3.3     | tetrahydrofuran               | 109-99-9   | t.i.      | solvent                                                              |
| 3.4     | cis-dichloroethylene          | 156-59-2   | t.i.      | solvent, degreasing, decomposition of trichloroethene                |
| 3.5     | trimethyl borate              | 121-43-7   | t.i.      | solvent, fungicide                                                   |
| 3.5     | ethyl acetate                 | 141-78-6   | t.i.      | solvent, natural compound                                            |
| 3.6     | 4-butoxy-3-methyl-2-butanone  | 54340-94-2 | t.i.      | -                                                                    |
| 3.6     | pyridine                      | 110-86-1   | t.i.      | flavors, chemical intermediate                                       |
| 3.6     | pyrazine                      | 290-37-9   | t.i.      | natural compound, flavors                                            |
| 3.6     | 1-butanol                     | 71-36-3    | t.i.      | natural compound, solvent                                            |
| 3.6     | dimethyl disulfide            | 624-92-0   | t.i.      | solvent, food additive                                               |
| 3.6     | 2-i-propoxyethanol            | 109-59-1   | t.i.      | solvent, germicide                                                   |
| 3.6     | 3-methyl-3-buten-2-one        | 814-78-8   | t.i.      | solvent, polymers                                                    |
| 3.7     | 1,5-hexadiyne                 | 628-16-0   | t.i.      | chemical intermediate                                                |
| 3.7     | 1,2-dimethoxyethane           | 110-71-4   | t.i.      | solvent                                                              |
| 3.7     | 2-butanone                    | 78-93-3    | t.i.      | solvent, ointment, cosmetics                                         |
| 3.8     | bis(dimethylsilyl)methane     | 18163-84-3 | t.i.      | -                                                                    |
| 3.8     | trimethyloxirane              | 5076-19-7  | t.i.      | chemical intermediate                                                |
| 3.8     | 3-penten-2-ol                 | 1569-50-2  | t.i.      | natural compound, chemical intermediate                              |
| 3.8     | 1,1,1-trichloroethane         | 71-55-6    | t.i.      | solvent                                                              |
| 3.9     | 4-methyl-3-hexano             | 615-29-2   | t.i.      | -                                                                    |
| 3.9     | methyl thiocyanate            | 556-64-9   | t.i.      | insecticide, chemical intermediate                                   |
| 3.9     | benzene                       | 71-43-2    | c.i.      | petroleum products                                                   |
| 3.9     | methyl pyruvate               | 600-22-6   | t.i.      | natural compound                                                     |
| 3.9     | 3-hexanone                    | 589-38-8   | t.i.      | natural compound, solvent                                            |
| 3.9     | 2,2,4-trimethyl-1,3-dioxolane | 1193-11-9  | t.i.      | processing of petroleum products                                     |
| 3.9     | 1,4-dioxane                   | 123-91-1   | t.i.      | stabilizer in halogenated solvents, solvent, wetting agent, cleaners |
| 3.9     | propyl acetate                | 109-60-4   | t.i.      | solvent, flavors, fragrances                                         |
| 3.9     | 3-pentanone                   | 96-22-0    | t.i.      | solvent, chemical intermediate                                       |
| 3.9     | 2,2-dimethoxypropane          | 77-76-9    | t.i.      | vinyl and others polymers                                            |
| 4       | 2-methyl-2-pentanol           | 590-36-3   | t.i.      | chemical intermediate                                                |
| 4       | trichloroethylene             | 79-01-6    | t.i.      | chemical cleaning, degreasing, industrial solvent                    |
| 4       | 2-methoxypropanol             | 1589-47-5  | t.i.      | the degradation product of antifreeze and plastic additives          |
| 4       | bromodichloromethane          | 75-27-4    | t.i.      | solvent, disinfection of water                                       |
| 4.1     | 1-chloro-2-butanol            | 1873-25-2  | t.i.      | -                                                                    |
| 4.1     | 3-methylbutanenitrile         | 625-28-5   | t.i.      | chemical intermediate                                                |
| 4.1     | 1-nonanol                     | 143-08-8   | t.i.      | cosmetics, emulsions, solvent                                        |

|     |                                       |            |      |                                                           |
|-----|---------------------------------------|------------|------|-----------------------------------------------------------|
| 4.1 | dimethyl sulfite                      | 616-42-2   | t.i. | natural compound                                          |
| 4.2 | 2,2-dimethoxybutane                   | 3453-99-4  | t.i. | -                                                         |
| 4.2 | 2-methoxy-2-methylbutane              | 994-05-8   | t.i. | addition to gasoline                                      |
| 4.2 | 1,1-dimethoxy-2-methylpropane         | 41632-89-7 | t.i. | chemical intermediate                                     |
| 4.2 | 3-methoxy-3-methyl-2-butanone         | 36687-98-6 | t.i. | natural compound                                          |
| 4.2 | methyl butyrate                       | 623-42-7   | t.i. | natural compound, solvent, cosmetics                      |
| 4.3 | diisopropoxymethane                   | 2568-89-0  | t.i. | -                                                         |
| 4.3 | 2,4,5-trimethyl-1,3-dioxolane         | 3299-32-9  | t.i. | natural compound, chemical intermediate                   |
| 4.3 | 1,1,2-trichloroethane                 | 79-00-5    | t.i. | solvent, chemical intermediate                            |
| 4.3 | 2-methylpyridine                      | 109-06-8   | t.i. | solvent, chemical intermediate                            |
| 4.3 | N-methylformamide                     | 123-39-7   | t.i. | solvent, chemical intermediate                            |
| 4.4 | 4,4'-Oxybis(2-pentene)                | 52867-34-2 | t.i. | -                                                         |
| 4.4 | 2-butyl-4-methyl-1,3-dioxolane        | 74094-60-3 | t.i. | flavors, fragrances                                       |
| 4.4 | toluene                               | 108-88-3   | c.i. | petroleum products                                        |
| 4.4 | 2-methyl-3-penten-1-ol                | 62238-37-3 | t.i. | natural compound                                          |
| 4.4 | 2-methyl butyraldehyde                | 96-17-3    | t.i. | natural compound, food                                    |
| 4.4 | 2-methyl pyrazine                     | 109-08-0   | t.i. | incineration and pyrolysis of organic material            |
| 4.4 | 2-butoxy-1-methylethyl acetate        | 85409-76-3 | t.i. | solvent                                                   |
| 4.4 | 2,4-dimethyl-3-pentanone              | 565-80-0   | t.i. | solvent                                                   |
| 4.4 | 2,3-dimethyl-2-butanol                | 594-60-5   | t.i. | solvent, chemical intermediate                            |
| 4.4 | methyl isobutyl ketone                | 108-10-1   | t.i. | solvent, natural compound                                 |
| 4.5 | 2-methyloct-2-en-4-one                | 19860-71-0 | t.i. | -                                                         |
| 4.5 | 2-hexanol                             | 626-93-7   | t.i. | flavors, fragrances                                       |
| 4.5 | 2-ethyl-4-methyl-1,3-dioxolane        | 4359-46-0  | t.i. | plastic                                                   |
| 4.5 | dibromochloromethane                  | 124-48-1   | t.i. | solvent, chemical intermediate                            |
| 4.5 | dimethyl sulfoxide                    | 67-68-5    | t.i. | solvent, chemical intermediate                            |
| 4.5 | octane                                | 111-65-9   | t.i. | solvent, chemical intermediate                            |
| 4.6 | 1-methoxy-2-methyl-2-propanol         | 3587-64-2  | t.i. | natural compound                                          |
| 4.6 | 2,3-dimethoxy-2-methylbutane          | 74421-00-4 | t.i. | -                                                         |
| 4.6 | 2-methyl-1,3,6-trioxocane             | 2781-01-3  | t.i. | -                                                         |
| 4.6 | vinyl methacrylate                    | 4245-37-8  | t.i. | chemical intermediate                                     |
| 4.6 | tetrachloroethylene                   | 127-18-4   | c.i. | chemical cleaning, degreasing, industrial solvent         |
| 4.6 | 2,5-dimethyl-1,4-dioxane              | 15176-21-3 | t.i. | plastic                                                   |
| 4.6 | dimethyl oxalate                      | 553-90-2   | t.i. | the degradation product of halogenated pesticides         |
| 4.6 | 1-ethoxy-2-propanol                   | 1569-02-4  | t.i. | solvent, chemical intermediate                            |
| 4.7 | 3-methyl-3-hexanol                    | 597-96-6   | t.i. | chemical intermediate                                     |
| 4.8 | diacetone alcohol                     | 123-42-2   | t.i. | plastic additive, solvent, chemical intermediate          |
| 4.8 | furfural                              | 98-01-1    | t.i. | polymers, flavors, solvent                                |
| 4.8 | 4,4-dimethyl-2-pentanone              | 590-50-1   | t.i. | solvent                                                   |
| 4.8 | 3-methyl pyridine                     | 108-99-6   | t.i. | solvent, resins                                           |
| 4.9 | 2,2-dimethyl-3-hexanol                | 4209-90-9  | t.i. | -                                                         |
| 4.9 | 1,3-dimethoxypropane                  | 17081-21-9 | t.i. | plastic additive, antifreeze, solvent                     |
| 4.9 | 3-hexen-1-ol                          | 544-12-7   | t.i. | cosmetics, natural compound                               |
| 4.9 | 1,3-dioxane                           | 505-22-6   | t.i. | monomer for acetyl polymers                               |
| 4.9 | 1-methoxy-2-propanyl acetate          | 108-65-6   | t.i. | plasticizer                                               |
| 5   | 4,5-diamino-6-hydroxypyrimidine       | 1672-50-0  | t.i. | -                                                         |
| 5   | 1-hexanol                             | 111-27-3   | t.i. | flavors, solvent, chemical intermediate                   |
| 5   | methyl 3-amino-2-thiophenecarboxylate | 22288-78-4 | t.i. | pharmaceutical intermediate                               |
| 5   | butyric acid                          | 107-92-6   | t.i. | chemical intermediate, flavors, cosmetics                 |
| 5   | ethylbenzene                          | 100-41-4   | c.i. | oil, solvent                                              |
| 5   | 1-(1-ethoxyethoxy)propane             | 20680-10-8 | t.i. | plastic, solvent                                          |
| 5   | 2-hexanone                            | 591-78-6   | t.i. | solvent in various preparations, ointments and antifreeze |
| 5   | t-butanol                             | 75-65-0    | t.i. | solvent, gasoline additive, pharmaceutical                |
| 5   | 4-methyl-3-penten-2-one               | 141-79-7   | t.i. | solvent, resin additive                                   |
| 5.1 | 2-hydroxy-2,4-dimethyl-3-pentanone    | 3212-67-7  | t.i. | -                                                         |

|     |                                             |                          |      |                                                    |
|-----|---------------------------------------------|--------------------------|------|----------------------------------------------------|
| 5.1 | ethyl dimethylcarbamate                     | 687-48-9                 | t.i. | -                                                  |
| 5.1 | 3-methyl-2-thiophene carboxaldehyde         | 5834-16-2                | t.i. | flavors, natural compound                          |
| 5.1 | hexanenitrile                               | 628-73-9                 | t.i. | burning and pyrolysis of organic material          |
| 5.1 | m- + p-Xylene                               | 108-38-3<br>and 106-42-3 | c.i. | petroleum products, chemical intermediate          |
| 5.1 | 4-methyl-2-pentanol                         | 108-11-2                 | t.i. | natural compound                                   |
| 5.2 | 5-methyl-3-hexanone                         | 623-56-3                 | t.i. | -                                                  |
| 5.2 | 2,4-dimethyl thiazole                       | 541-58-2                 | t.i. | flavors, pharmaceutical intermediate               |
| 5.2 | 3,3-dimethyl-2-butanone                     | 75-97-8                  | t.i. | chemical intermediate                              |
| 5.2 | phenylacetylene                             | 536-74-3                 | t.i. | chemical intermediate                              |
| 5.2 | 2,6-dimethyl heptane                        | 1072-05-5                | t.i. | natural compound                                   |
| 5.2 | 1-nonene                                    | 124-11-8                 | t.i. | natural compound, gasoline, chemical intermediate  |
| 5.2 | n-butyl acetate                             | 123-86-4                 | t.i. | solvent, flavors                                   |
| 5.3 | dimethoxymethane                            | 109-87-5                 | t.i. | cosmetics, solvent, fuel additive                  |
| 5.3 | o-xylene                                    | 95-47-6                  | c.i. | petroleum products, chemical intermediate          |
| 5.3 | tribromomethane                             | 75-25-2                  | t.i. | solvent, disinfection of water                     |
| 5.3 | 2-butenic acid                              | 3724-65-0                | t.i. | solvent, additive for general use preparations     |
| 5.3 | 3-heptanol                                  | 589-82-2                 | t.i. | solvent, chemical intermediate                     |
| 5.4 | 5,10-undecadien-3-amine                     | 66889-12-1               | t.i. | -                                                  |
| 5.4 | 2-ethyl-5-methyl-1,3-dioxane                | 20627-54-7               | t.i. | -                                                  |
| 5.4 | 3,3-dimethyl-1,2-butanediol                 | 59562-82-2               | t.i. | -                                                  |
| 5.4 | 2-acetylfuran                               | 1192-62-7                | t.i. | flavors, fragrances                                |
| 5.4 | 2-decen-1-ol                                | 22104-80-9               | t.i. | flavors, fragrances                                |
| 5.4 | bis(methylthio)methane                      | 1618-26-4                | t.i. | flue gases, a product of microbiological processes |
| 5.4 | 2-methyl cyclopentanone                     | 1120-72-5                | t.i. | chemical intermediate                              |
| 5.4 | 2-methyl-2-cyclopenten-1-one                | 1120-73-6                | t.i. | natural compound, food                             |
| 5.4 | 1-ethoxybutane                              | 628-81-9                 | t.i. | oxygenate                                          |
| 5.4 | 2,6-dimethyl-1,4-dioxane                    | 10138-17-7               | t.i. | plastic                                            |
| 5.4 | 1-vinyl-2-pyrrolidinone                     | 88-12-0                  | t.i. | polymers, cosmetics and pharmaceuticals            |
| 5.4 | 2,5-dimethylpyrazine                        | 123-32-0                 | t.i. | protein decomposition                              |
| 5.5 | 2,5-dipropyltetrahydrofuran                 | 4457-62-9                | t.i. | -                                                  |
| 5.5 | 4-methoxy-okt-2-en                          | *NIST1850<br>62          | t.i. | -                                                  |
| 5.5 | 2-aminocyclohexanol                         | 6850-38-0                | t.i. | chemical intermediate                              |
| 5.5 | dimethyl malonate                           | 108-59-8                 | t.i. | chemical intermediate                              |
| 5.5 | anisole                                     | 100-66-3                 | t.i. | cosmetics, chemical intermediate                   |
| 5.5 | 1,1,2,2-tetrachloroethane                   | 79-34-5                  | t.i. | solvent, degreasing                                |
| 5.6 | 6-methyl-2-octyl- (2-cis) -1,3-dioxan-4-one | 99902-25-7               | t.i. | -                                                  |
| 5.6 | N,N-diethylpent-2-yn-1-amine                | 73117-10-9               | t.i. | -                                                  |
| 5.6 | 2-methyl dioxane                            | 626-68-6                 | t.i. | natural compound                                   |
| 5.6 | 2-methylbutyric acid                        | 116-53-0                 | t.i. | natural compound, cosmetics                        |
| 5.6 | 4-methyl-2-pentyl-1,3-dioxolan              | 1599-49-1                | t.i. | plastic                                            |
| 5.6 | 5,5-dimethyl-1,3-dioxane                    | 872-98-0                 | t.i. | plastic                                            |
| 5.6 | 2-ethylhexanal                              | 123-05-7                 | t.i. | plastic                                            |
| 5.6 | methapyrilene                               | 91-80-5                  | t.i. | pharmaceuticals                                    |
| 5.7 | N,N-diethylformamide                        | 617-84-5                 | t.i. | chemical intermediate                              |
| 5.7 | 3-penten-1-ol                               | 39161-19-8               | t.i. | natural compound, flavors, cosmetics               |
| 5.7 | 5-methyl-1-hepten-4-ol                      | 99328-46-8               | t.i. | natural compound, cosmetics                        |
| 5.7 | 1-butoxypropan-2-ol                         | 5131-66-8                | t.i. | plastic, solvent                                   |
| 5.7 | N-ethylpentanamide                          | 54007-33-9               | t.i. | tobacco smoke                                      |
| 5.7 | 3-ethyl-3-pentanol                          | 597-49-9                 | t.i. | solvent                                            |
| 5.7 | diethylene glycol dimethyl ether            | 111-96-6                 | t.i. | solvent, chemical intermediate                     |
| 5.7 | 1-butoxypropan-2-ol                         | 5131-66-8                | t.i. | solvent, general purpose chemicals                 |

|     |                                               |                 |      |                                                                            |
|-----|-----------------------------------------------|-----------------|------|----------------------------------------------------------------------------|
| 5.7 | 2-butoxyethanol                               | 111-76-2        | t.i. | brake fluids, solvent                                                      |
| 5.8 | 5-methyl-5-nonanol                            | 33933-78-7      | t.i. | -                                                                          |
| 5.8 | 2-butenic acid                                | 503-64-0        | t.i. | chemical intermediate, solvent                                             |
| 5.8 | 1-tert-butoxy-2-methoxyethane                 | 66728-50-5      | t.i. | solvent, plasticizer                                                       |
| 5.9 | 1-propanone,1-(3-cyclohexen-1-yl)-2,2-dimethy | 16076-65-6      | t.i. | -                                                                          |
| 5.9 | diethylene glycol                             | 111-46-6        | t.i. | antifreeze, cosmetics, solvent, chemical intermediate                      |
| 5.9 | N-ethylmorpholine                             | 100-74-3        | t.i. | chemical intermediate                                                      |
| 5.9 | 2-ethyltoluene                                | 611-14-3        | t.i. | petroleum products                                                         |
| 5.9 | 1-(1-methyl-2-cyclopentenyl)ethanone          | 68752-16-9      | t.i. | natural compound                                                           |
| 5.9 | propylbenzene                                 | 103-65-1        | t.i. | component of asphalt, oil                                                  |
| 5.9 | cis-2-Methylcyclohexanol                      | 7443-70-1       | t.i. | solvent, chemical intermediate                                             |
| 5.9 | acetaldehyde ethyl methyl acetal              | 10471-14-4      | t.i. | -                                                                          |
| 6   | tetrahydro-2,5-dimethyl-2H-pyranmethanol      | 54004-46-5      | t.i. | -                                                                          |
| 6   | diisobutoxymethane                            | 2568-91-4       | t.i. | -                                                                          |
| 6   | 3-heptanone                                   | 106-35-4        | t.i. | flavors, solvent for varnishes, cellulose, vinyl and nitrocellulose resins |
| 6   | dimethylaminoethyl acrylate                   | 2439-35-2       | t.i. | chemical intermediate, polymers                                            |
| 6   | benzaldehyde                                  | 100-52-7        | t.i. | chemical intermediate, solvent, repellent for bees                         |
| 6   | 4-methyl valeric acid                         | 646-07-1        | t.i. | natural compound, biomass degradation                                      |
| 6   | styrene                                       | 100-42-5        | c.i. | plastic, tire, solvent, chemical intermediate                              |
| 6   | diisobutyl ketone                             | 108-83-8        | t.i. | solvent                                                                    |
| 6   | cyclohexanol                                  | 108-93-0        | t.i. | solvent, chemical intermediate                                             |
| 6   | acetamide                                     | 60-35-5         | t.i. | solvent, plasticizer, chemical intermediate                                |
| 6.1 | 2-ethyl-1,3-dioxolane-4-methanol              | 53951-44-3      | t.i. | -                                                                          |
| 6.1 | dimethyl trisulfide                           | 3658-80-8       | t.i. | flavors, fragrances                                                        |
| 6.1 | fenole                                        | 108-95-2        | c.i. | disinfection, chemical intermediate                                        |
| 6.1 | 4H-pyran-4-one                                | 108-97-4        | t.i. | product of burning                                                         |
| 6.1 | tetramethyl urea                              | 632-22-4        | t.i. | solvent                                                                    |
| 6.2 | 4-ethyl-2-methyl thiazole                     | 32272-48-3      | t.i. | flavors                                                                    |
| 6.2 | 2,4,5-trimethyl thiazole                      | 13623-11-5      | t.i. | flavors, food additive                                                     |
| 6.2 | benzonitrile                                  | 100-47-0        | t.i. | cosmetics, chemical intermediate                                           |
| 6.2 | 2,2,4,6,6-pentamethylheptane                  | 13475-82-6      | t.i. | petroleum products                                                         |
| 6.2 | 2-pentylfuran                                 | 3777-69-3       | t.i. | natural compound, flavors                                                  |
| 6.2 | cyclohexanone                                 | 108-94-1        | t.i. | production of nylon, solvent                                               |
| 6.2 | 2-butoxyethanol                               | 111-76-2        | t.i. | water-based coating solvent, component of brake fluids                     |
| 6.3 | glicerine                                     | 56-81-5         | t.i. | cosmetics, pharmaceuticals                                                 |
| 6.3 | benzofuran                                    | 271-89-6        | t.i. | coal tar                                                                   |
| 6.4 | S-methyldimethylthiocarbamate                 | 3013-02-03      | t.i. | -                                                                          |
| 6.4 | 2,2,4-trimethylpentanenitrile                 | 69462-10-8      | t.i. | -                                                                          |
| 6.4 | 2-(methylamino)ethanethiol                    | 52288-89-8      | t.i. | -                                                                          |
| 6.4 | tert-butyl 3-hydroxybutanoate                 | 90435-23-7      | t.i. | -                                                                          |
| 6.4 | 3,5,5-trimethyl hexanol                       | 3452-97-9       | t.i. | chemical intermediate                                                      |
| 6.4 | 5-methyl-3-hexanol,                           | 623-55-2        | t.i. | natural compound                                                           |
| 6.4 | p-benzoquinone                                | 106-51-4        | t.i. | product of disinfection                                                    |
| 6.4 | 3-octanol                                     | 589-98-0        | t.i. | product of microorganisms                                                  |
| 6.4 | 3-methoxypyridine                             | 7295-76-3       | t.i. | pyrolysis product                                                          |
| 6.4 | 2-(2-ethoxyethoxy)-2-methylpropane            | 51422-54-9      | t.i. | solvent                                                                    |
| 6.4 | 2-(2-methoxypropoxy)propan-1-ol               | 13588-28-8      | t.i. | solvent, emulsifier                                                        |
| 6.5 | 3-(2-methoxypropoxy)-1-butyne                 | 55702-66-4      | t.i. | -                                                                          |
| 6.5 | 2-ethyl-4,6-dimethyltetrahydropyran           | *NIST<br>210775 | t.i. | -                                                                          |
| 6.5 | methyl-p-benzoquinone                         | 553-97-9        | t.i. | -                                                                          |
| 6.5 | glycidyl hexyl ether                          | 5926-90-9       | t.i. | -                                                                          |
| 6.5 | 2-pentenoic acid                              | 626-98-2        | t.i. | flavors, natural compound                                                  |

|     |                                     |            |      |                                                                     |
|-----|-------------------------------------|------------|------|---------------------------------------------------------------------|
| 6.5 | cumene                              | 98-82-8    | t.i. | addition to gasoline, chemical intermediate, solvent                |
| 6.5 | 1,3-dichlorobenzene                 | 541-73-1   | c.i. | insecticide, chemical intermediate                                  |
| 6.5 | 1,4-dichlorobenzene                 | 106-46-7   | c.i. | insecticide, chemical intermediate                                  |
| 6.5 | verbenol                            | 473-67-6   | t.i. | metabolite of terpenes                                              |
| 6.5 | isopropyl disulfide                 | 4253-89-8  | t.i. | natural compound, flavors                                           |
| 6.5 | 1-(2-methoxypropoxy)propan-2-ol     | 13429-07-7 | t.i. | solvent, emulsifier                                                 |
| 6.6 | 4,4,5-trimethyl-1,3-dioxan-5-ol     | 54063-14-8 | t.i. | fragrances                                                          |
| 6.6 | 5,5-dimethyl-2(5H)-furanone         | 20019-64-1 | t.i. | addition of rubber                                                  |
| 6.6 | dipropylene Glycol                  | 110-98-5   | t.i. | plastic additive, solvent, air disinfection                         |
| 6.6 | alpha-pinene                        | 80-56-8    | t.i. | insecticide, cosmetics, solvent, plasticizers                       |
| 6.6 | 2-ethylhexanol                      | 104-76-7   | t.i. | ointments, solvent, plasticizer                                     |
| 6.6 | 3-ethoxy-1,2-propanediol            | 1874-62-0  | t.i. | microbial degradation of glycol ethers                              |
| 6.6 | 2-propyl-1-pentanol                 | 58175-57-8 | t.i. | natural compound, cosmetics                                         |
| 6.7 | (methoxymethyl)thiirane             | 19858-14-1 | t.i. | -                                                                   |
| 6.7 | 3-ethylheptan-3-ol                  | 19780-41-7 | t.i. | -                                                                   |
| 6.7 | 2,2-dimethyl-1,3-propanediol        | 126-30-7   | t.i. | chemical intermediate                                               |
| 6.7 | dicyclopentadiene                   | 77-73-6    | t.i. | chemical intermediate, repellents                                   |
| 6.7 | benzyl alcohol                      | 100-51-6   | t.i. | cosmetics, chemical intermediate                                    |
| 6.7 | indan                               | 496-11-7   | t.i. | petroleum products                                                  |
| 6.7 | paraldehyde                         | 123-63-7   | t.i. | solvent, pharmaceutical, chemical intermediate                      |
| 6.7 | metaldehyde                         | 108-62-3   | t.i. | snail suppression, polymers                                         |
| 6.8 | 2,2-dimethylpropane-1-thiol         | 1679-08-9  | t.i. | -                                                                   |
| 6.8 | glycinglycine ethyl ester           | 627-74-7   | t.i. | -                                                                   |
| 6.8 | 2-methylcyclohexanol                | 583-59-5   | t.i. | flavors                                                             |
| 6.8 | butyl hexanoate                     | 626-82-4   | t.i. | flavors                                                             |
| 6.8 | o-vinyltoluene                      | 611-15-4   | t.i. | petroleum products, chemical intermediate                           |
| 6.8 | 2-methyl-2,4-pentanediol            | 107-41-5   | t.i. | natural compound, flavors, cosmetics                                |
| 6.8 | 2-isopropyl-1,3-dioxolane           | 822-83-3   | t.i. | oxygenate                                                           |
| 6.8 | 1-methyl-2-pyrrolidone              | 872-50-4   | t.i. | solvent, colors                                                     |
| 6.8 | 2,2'-oxydipropanol                  | 108-61-2   | t.i. | solvent, plastic additive                                           |
| 6.9 | p-menthan-4-ol                      | 470-65-5   | t.i. | -                                                                   |
| 6.9 | 3,3,5-trimethylcyclohexanone        | 873-94-9   | t.i. | flavors                                                             |
| 6.9 | 2,5-dimethyl-2,5-hexanediol         | 110-03-2   | t.i. | chemical intermediate                                               |
| 6.9 | 4-butoxybutan-1-ol                  | 4161-24-4  | t.i. | chemical intermediate                                               |
| 6.9 | 3,7-dimethyloctan-3-ol              | 78-69-3    | t.i. | cosmetics, natural compound                                         |
| 6.9 | ethyl 3-hydroxyhexanoate            | 2305-25-1  | t.i. | natural compound, food additive                                     |
| 6.9 | 2,6-Dimethyl-4-heptanone            | 108-83-8   | t.i. | solvent, addition to polymers                                       |
| 6.9 | 2,2,5,5-tetramethyl tetrahydrofuran | 15045-43-9 | t.i. | solvent, chemical intermediate                                      |
| 6.9 | 2-methyl cyclohexanone              | 583-60-8   | t.i. | solvent, rust remover                                               |
| 7   | 1-desoxy-d-mannitol                 | 60965-81-3 | t.i. | -                                                                   |
| 7   | 3-octanone                          | 106-68-3   | t.i. | flavors, industrial solvent also for resins and varnishes           |
| 7   | decyl isobutyrate                   | 5454-22-8  | t.i. | flavors, natural compound                                           |
| 7   | beta-pinene                         | 127-91-3   | t.i. | insecticide, solvent, plasticizer, cosmetics, chemical intermediate |
| 7   | hexanedinitrile                     | 111-69-3   | t.i. | chemical intermediate                                               |
| 7   | 4-methylbenzaldehyde                | 104-87-0   | t.i. | cosmetics, flavors                                                  |
| 7   | methyl heptenone                    | 110-93-0   | t.i. | natural compound                                                    |
| 7   | dibutoxymethane                     | 2568-90-3  | t.i. | solvent                                                             |
| 7   | diisobutyl Ether                    | 628-55-7   | t.i. | solvent                                                             |
| 7   | 1,4-diethyl benzene                 | 105-05-5   | t.i. | solvent, chemical intermediate                                      |
| 7   | 4,6-dimethylheptan-2-one            | 19549-80-5 | t.i. | solvent, chemical intermediate, addition to polymers                |
| 7   | cresol                              | 1319-77-3  | t.i. | solvent, organic intermediate, wood protection                      |

|     |                                                |                 |      |                                                                                            |
|-----|------------------------------------------------|-----------------|------|--------------------------------------------------------------------------------------------|
| 7.1 | 1,4-dimethoxy-2,3-butanediol                   | 119613-19-3     | t.i. | -                                                                                          |
| 7.1 | N-(sulfinylamino)aniline                       | 17420-03-0      | t.i. | -                                                                                          |
| 7.1 | 1,1,4,4-tetrachlorobutadiene                   | 36038-53-6      | t.i. | industrial chemical                                                                        |
| 7.1 | acetophenone                                   | 98-86-2         | t.i. | cosmetics and others                                                                       |
| 7.1 | 3,3,5-Trimethylcyclohexanol                    | 116-02-9        | t.i. | menthol substitute, antifoam, hydraulic fluids, esterification reagent, inks, wax additive |
| 7.1 | 2-methyl-2-(methylamino)propan-1-ol            | 27646-73-7      | t.i. | natural compound                                                                           |
| 7.1 | isopropyl propyl disulphide                    | 33672-51-4      | t.i. | natural compound, flavors                                                                  |
| 7.1 | methyl-propyl sulfoxide                        | 14094-08-7      | t.i. | textile industry                                                                           |
| 7.1 | diethylene glycol diethyl ether                | 112-36-7        | t.i. | solvent                                                                                    |
| 7.1 | 2,6-dimethyl-4-heptanol                        | 108-82-7        | t.i. | solvent, addition to polymers, flavors                                                     |
| 7.1 | N-nitrosomorpholine                            | 59-89-2         | t.i. | solvent, chemical intermediate                                                             |
| 7.2 | cis-3-hexenyl Acetate                          | 3681-71-8       | t.i. | flavors, fragrances                                                                        |
| 7.2 | octanal                                        | 124-13-0        | t.i. | flavors, cosmetics                                                                         |
| 7.2 | o-cresol                                       | 95-48-7         | t.i. | disinfection, solvent, chemical intermediate                                               |
| 7.2 | m-Cresol                                       | 108-39-4        | t.i. | disinfection, solvent, chemical intermediate                                               |
| 7.2 | cyclohexyl isocyanate                          | 3173-53-3       | t.i. | chemical intermediate                                                                      |
| 7.2 | 2-methylglutaronitrile                         | 4553-62-2       | t.i. | chemical intermediate, solvent                                                             |
| 7.2 | cis-homomenthol                                | 933-48-2        | t.i. | metabolite                                                                                 |
| 7.3 | 3-isopropyl-2-phenyl-penten-2-ol               | 344332-17-8     | t.i. | -                                                                                          |
| 7.3 | para-alpha-dimethyl styrene                    | 1195-32-0       | t.i. | flavors, fragrances                                                                        |
| 7.3 | 1-methoxy-1-methylethyl benzene                | 935-67-1        | t.i. | flavors, cosmetics                                                                         |
| 7.3 | 1-(2-methoxy-1-methylethoxy)propan-2-ol        | 20324-32-7      | t.i. | general purpose chemical                                                                   |
| 7.3 | nitrobenzene                                   | 98-95-3         | t.i. | solvent, chemical intermediate                                                             |
| 7.4 | 1,4-diethoxy-2-butene                          | 7250-85-3       | t.i. | -                                                                                          |
| 7.4 | ocimene                                        | 29714-87-2      | t.i. | flavors, fragrances                                                                        |
| 7.4 | undecane                                       | 1120-21-4       | t.i. | gasoline and other petroleum fuels                                                         |
| 7.4 | 2-phenylpropan-2-ol                            | 617-94-7        | t.i. | chemical intermediate, solvent                                                             |
| 7.4 | 4-cyano-1-cyclohexene                          | 100-45-8        | t.i. | bromobenzene metabolite                                                                    |
| 7.4 | 3,3-diethylpentane                             | 1067-20-5       | t.i. | petroleum products                                                                         |
| 7.5 | 1-ethyl-2-methylpyrrolidine                    | 765-79-7        | t.i. | -                                                                                          |
| 7.5 | 2,6-dimethyl-2,5-heptadien-4-one               | 504-20-1        | t.i. | -                                                                                          |
| 7.5 | D-limonene                                     | 5989-27-5       | t.i. | fragrances, cosmetics                                                                      |
| 7.5 | 5 methyl 3 heptyne                             | 63922-44-1      | t.i. | chemical intermediate                                                                      |
| 7.5 | 2-methoxycyclohexanone                         | 7429-44-9       | t.i. | cosmetics                                                                                  |
| 7.5 | D-fenchone                                     | 126-21-6        | t.i. | natural terpene compound                                                                   |
| 7.5 | 4-ethenyl-1,2-dimethyl-benzene                 | 27831-13-6      | t.i. | general pollutant                                                                          |
| 7.6 | (E)-(3,3-dimethylcyclohexylidene)acetaldehyde  | 26532-25-2      | t.i. | -                                                                                          |
| 7.6 | 2-propyl-1,3-dioxonane                         | *NIST<br>249774 | t.i. | -                                                                                          |
| 7.6 | dihydrocarveol                                 | 619-01-2        | t.i. | flavors, fragrances                                                                        |
| 7.6 | 2,2'-azobis(isobutyronitrile)                  | 78-67-1         | t.i. | plastic additive                                                                           |
| 7.6 | methyl octanoate                               | 111-11-5        | t.i. | chemical intermediate, food additive                                                       |
| 7.6 | triethyl phosphate                             | 78-40-0         | t.i. | plasticizer                                                                                |
| 7.6 | 2-methyloctan-1-ol                             | 818-81-5        | t.i. | solvent                                                                                    |
| 7.7 | 4-acetylocta-1,2-diene                         | *NIST<br>250445 | t.i. | -                                                                                          |
| 7.7 | alpha-hydroxy-alpha-methylbenzyl phenyl ketone | 5623-26-7       | t.i. | -                                                                                          |
| 7.7 | 4,6-dimethyl-2-pyrone                          | 675-09-2        | t.i. | fragrances                                                                                 |
| 7.7 | tempidon                                       | 826-36-8        | t.i. | chemical intermediate                                                                      |
| 7.7 | N-formylmorpholine                             | 4394-85-8       | t.i. | solvent                                                                                    |
| 7.8 | 1-ethylpyrrolidin-2-one                        | 2687-91-4       | t.i. | chemical intermediate                                                                      |
| 7.8 | beta-pinone                                    | 24903-95-5      | t.i. | natural compound                                                                           |

|     |                                                 |                 |      |                                                             |
|-----|-------------------------------------------------|-----------------|------|-------------------------------------------------------------|
| 7.8 | 3,4-dimethylhexane-2,5-dione                    | 25234-79-1      | t.i. | plastic                                                     |
| 7.8 | N,2-dimethylpropanamide                         | 2675-88-9       | t.i. | tobacco smoke, chemical intermediate                        |
| 7.8 | N-isobutyl acetamide                            | 1540-94-9       | t.i. | tobacco smoke, food                                         |
| 7.9 | 4,6-decadiyne                                   | 16387-71-6      | t.i. | -                                                           |
| 7.9 | 4H-1,3-benzodioxin                              | 254-27-3        | t.i. | -                                                           |
| 7.9 | N-isoamyl acetamide                             | 13434-12-3      | t.i. | -                                                           |
| 7.9 | 1,2-dimethoxybenzene                            | 91-16-7         | t.i. | flavors                                                     |
| 7.9 | 1-[1-methyl-2-(2-propenyloxy)ethoxy]-2-propanol | 55956-25-7      | t.i. | color additive                                              |
| 7.9 | (1r)-(+)-nopinone                               | 38651-65-9      | t.i. | natural compound                                            |
| 7.9 | 1-octanol                                       | 111-87-5        | t.i. | solvent, cosmetics                                          |
| 8   | 3,5,5-trimethylhexanoic acid                    | 3302-10-1       | t.i. | chemical intermediate                                       |
| 8   | 3-ethyle-4-nonanol                              | 19780-72-4      | t.i. | -                                                           |
| 8   | 2-methylbenzaldehyde                            | 529-20-4        | t.i. | exhaust gases                                               |
| 8   | but-3-en-2-ylbenzene                            | 934-10-1        | t.i. | petroleum products                                          |
| 8   | 2,4-dimethyl styrene                            | 2234-20-0       | t.i. | petroleum products, chemical intermediate, component of gum |
| 8   | 4-methylindan                                   | 824-22-6        | t.i. | decomposition of petroleum products                         |
| 8.1 | 2-ethyl thiazolidine                            | 24050-09-7      | t.i. | -                                                           |
| 8.1 | diethyl ethylphosphonate                        | 78-38-6         | t.i. | addition to gasoline, plasticizer, textile processing       |
| 8.1 | 2-phenylacetamide                               | 103-81-1        | t.i. | pharmaceutical intermediate, metabolite                     |
| 8.1 | 2,2,6,6-tetramethylpiperidin-4-ol               | 2403-88-5       | t.i. | chemical intermediate                                       |
| 8.1 | 2,6-dimethylaniline                             | 87-62-7         | t.i. | chemical intermediate                                       |
| 8.1 | dimethyl benzyl carbinol                        | 100-86-7        | t.i. | cosmetics, natural compound                                 |
| 8.1 | 3-methyl undecane                               | 1002-43-3       | t.i. | petroleum products                                          |
| 8.1 | sabina ketone                                   | 513-20-2        | t.i. | natural compound, cosmetics                                 |
| 8.2 | tert-butyl cyclohexanecarboxylate               | 16537-05-6      | t.i. | -                                                           |
| 8.2 | 2,4,6-trimethyl-decane                          | 62108-27-4      | t.i. | -                                                           |
| 8.2 | 2-hexyl-1-n-octanol                             | 19780-79-1      | t.i. | -                                                           |
| 8.2 | dibutyltin dilaurate                            | 88481-58-7      | t.i. | -                                                           |
| 8.2 | p-cresol                                        | 106-44-5        | t.i. | disinfection, solvent, chemical intermediate                |
| 8.2 | 1,2,3-trimethylindene                           | 4773-83-5       | t.i. | petroleum products                                          |
| 8.2 | 1,3-Dimethoxybenzene                            | 151-10-0        | t.i. | natural compound, flavors, cosmetics                        |
| 8.2 | 2-propylheptan-1-ol                             | 10042-59-8      | t.i. | component of petroleum products, waste water                |
| 8.2 | o-cymene                                        | 527-84-4        | t.i. | solvent, chemical intermediate                              |
| 8.3 | 2-methyl-1-hexene                               | 6094-02-6       | t.i. | -                                                           |
| 8.3 | 3-methyl-1- (methylsulfinyl) butane             | 55860-10-1      | t.i. | -                                                           |
| 8.3 | nonanal                                         | 124-19-6        | t.i. | flavors, cosmetics                                          |
| 8.3 | 2-(2-butoxyethoxy)ethanol                       | 112-34-5        | t.i. | solvent, chemical intermediate                              |
| 8.3 | 1,2,3,4-tetrahydronaphthalene                   | 119-64-2        | t.i. | solvent, decomposition of petroleum products                |
| 8.3 | 2-(2-ethoxyethoxy)ethanol                       | 111-90-0        | t.i. | solvent, brake fluids, cosmetics                            |
| 8.4 | 1,2-dihydro-8-hydroxylinalol                    | *NIST<br>131835 | t.i. | -                                                           |
| 8.4 | 2,4-dimethyl-pentane-2,3-diol                   | 66225-53-4      | t.i. | -                                                           |
| 8.4 | bicyclo[2.2.2]octane-1,4-diol                   | 1194-44-1       | t.i. | -                                                           |
| 8.4 | 2,2,6,6-tetramethyl-4-piperidone                | 826-36-8        | t.i. | alkaloide                                                   |
| 8.4 | 4-acetylmorpholine                              | 1696-20-4       | t.i. | chemical intermediate                                       |
| 8.4 | tetrahydro-1,3-dimethyl-1H-pyrimidin-2-one      | 7226-23-5       | t.i. | chemical intermediate                                       |
| 8.4 | methyl benzoate                                 | 93-58-3         | t.i. | cosmetics                                                   |
| 8.4 | dextro-dihydrocarvone                           | 7764-50-3       | t.i. | cosmetics, natural compound                                 |
| 8.4 | dimethyl trithiocarbonate                       | 2314-48-9       | t.i. | microbiological processes                                   |
| 8.4 | p-cimen-8-ol                                    | 1197-01-9       | t.i. | natural compound, biomass degradation, flavors              |
| 8.5 | 1,7,7-trimethylbicyclo [2.2.1] heptane-2,5-diol | 10359-41-8      | t.i. | -                                                           |
| 8.5 | 2-piperidone                                    | 675-20-7        | t.i. | pharmaceutical intermediate                                 |
| 8.5 | N,N'-dimethylparabanic acid                     | 5176-82-9       | t.i. | metabolite of caffeine                                      |

|     |                                           |             |      |                                                                  |
|-----|-------------------------------------------|-------------|------|------------------------------------------------------------------|
| 8.5 | 2-methyl-2H-benzotriazole                 | 16584-00-2  | c.i. | anti-corrosion agents, herbicidal and antimicrobial preparations |
| 8.5 | 4,7-dimethylindan                         | 6682-71-9   | t.i. | tobacco smoke                                                    |
| 8.5 | sulfolane                                 | 126-33-0    | t.i. | solvent, resins                                                  |
| 8.6 | 1-methyl-4- (1-methyl-2-propenyl) benzene | 97664-18-1  | t.i. | -                                                                |
| 8.6 | 4-ethoxycyclohexanone                     | 23510-92-1  | t.i. | -                                                                |
| 8.6 | naphthalene                               | 91-20-3     | c.i. | chemical intermediate, constituent of moth repellents            |
| 8.6 | 2,4,8,10-tetraoxaspiro[5.5]undecane       | 126-54-5    | t.i. | chemical intermediate                                            |
| 8.6 | 2-[(2-ethylhexyl)oxy]ethanol              | 1559-35-9   | t.i. | chemical intermediate, solvent, colors                           |
| 8.6 | 2-phenylethyl alcohol                     | 60-12-8     | t.i. | general purpose chemical, natural compound                       |
| 8.6 | phenoxyacetone                            | 621-87-4    | t.i. | general purpose chemical, waste water                            |
| 8.6 | 1-i-propenyl-3-i-propylbenzene            | 1129-29-9   | t.i. | petroleum products                                               |
| 8.6 | 6-metil-1-okten                           | 13151-10-5  | t.i. | petroleum products                                               |
| 8.6 | 6-methyl-1-octene                         | 110453-78-6 | t.i. | natural compound, cosmetics                                      |
| 8.6 | 2-methyl valeric acid                     | 97-61-0     | t.i. | natural compound, biomass degradation                            |
| 8.6 | 1,3,5,7-tetroxocane                       | 293-30-1    | t.i. | formaldehyde tetramer                                            |
| 8.6 | 1-butoxyethoxy-2-propanol                 | 124-16-3    | t.i. | solvent, chemical intermediate                                   |
| 8.7 | 2-thio-2,4-oxazolidinedione               | 2346-24-9   | t.i. | -                                                                |
| 8.7 | 5-methyl isoxazolidinone                  | 41833-03-8  | t.i. | -                                                                |
| 8.7 | 6,7-dimethyl dihydrocyclopentapyrazine    | 38917-61-2  | t.i. | flavors                                                          |
| 8.7 | 2',4'-dimethyl acetophenone               | 89-74-7     | t.i. | flavors, cosmetics                                               |
| 8.7 | octaethyleneglycol monododecyl ether      | 3055-98-9   | t.i. | detergent                                                        |
| 8.7 | cyclohexyl isothiocyanate                 | 1122-82-3   | t.i. | tire, industrial wastewater                                      |
| 8.7 | 2,5-dimethyl-1H-benzimidazole             | 1792-41-2   | t.i. | chemical intermediate                                            |
| 8.7 | dimethyltetrasulfide                      | 5756-24-1   | t.i. | microbiological processes                                        |
| 8.7 | 1,3-diisopropylbenzene                    | 99-62-7     | t.i. | petroleum products                                               |
| 8.7 | 3-ethyl-4-methyl-pyrrole-2,5-dione        | 20189-42-8  | t.i. | natural compound, flavors, waste water                           |
| 8.7 | 2,6-dichloroaniline                       | 608-31-1    | t.i. | Diclofenac (pharmaceutical) oxidation                            |
| 8.7 | 1,2-bis(2-methoxyethoxy)ethane            | 112-49-2    | t.i. | solvent, plasticizer                                             |
| 8.8 | 1,3-di-tert-butylbenzene                  | 1014-60-4   | t.i. | -                                                                |
| 8.8 | 1-phenyl-1-butene                         | 824-90-8    | t.i. | -                                                                |
| 8.8 | 2,3-dimethoxytoluene                      | 4463-33-6   | t.i. | flavors                                                          |
| 8.8 | benzothiazole                             | 95-16-9     | t.i. | addition of rubber, antimicrobial preparations, flavors          |
| 8.8 | N,N-dimethylmethanesulfonamide            | 918-05-8    | t.i. | chemical intermediate                                            |
| 8.8 | 2,5-dimethyl benzoxazole                  | 5676-58-4   | t.i. | natural compound                                                 |
| 8.9 | tropine 4-tolylacetate methiodide         | 5135-79-5   | t.i. | -                                                                |
| 8.9 | 4-methoxymethoxy-2-methyl-butan-2-ol      | 37587-78-3  | t.i. | -                                                                |
| 8.9 | 2-propylcyclohexanone                     | 94-65-5     | t.i. | -                                                                |
| 8.9 | 2-tert-butyl-1,4-benzoquinone             | 3602-55-9   | t.i. | antioxidant                                                      |
| 8.9 | hydroxyciol                               | 107-74-4    | t.i. | flavors                                                          |
| 8.9 | 1-methyltetraline                         | 1559-81-5   | t.i. | atmospheric reactions                                            |
| 8.9 | D-sorbitol                                | 50-70-4     | t.i. | food, cosmetics                                                  |
| 8.9 | 2,4-dichloroaniline                       | 554-00-7    | t.i. | chemical intermediate                                            |
| 8.9 | 1,2-octanediol                            | 1117-86-8   | t.i. | cosmetics, pharmacy                                              |
| 8.9 | 4-hydroxy-3-methyl acetophenone           | 876-02-8    | t.i. | natural compound                                                 |
| 8.9 | desulphosinigrin                          | 5115-81-1   | t.i. | natural compound                                                 |
| 8.9 | (E)-2-decenal                             | 3913-81-3   | t.i. | natural compound, cosmetics                                      |
| 8.9 | 4-isopropylphenyl isocyanate              | 31027-31-3  | t.i. | thermal decomposition of isoproturon herbicides                  |
| 8.9 | tetraethylene glycol diethyl ether        | 4353-28-0   | t.i. | solvent, plasticizer                                             |
| 9   | 3,3'-oxydipropionitrile                   | 1656-48-0   | t.i. | chemical intermediate                                            |
| 9   | benzoic acid                              | 65-85-0     | t.i. | chemical intermediate                                            |
| 9   | methyl 3-hydroxyoctanoate                 | 7367-87-5   | t.i. | natural compound                                                 |
| 9   | methyl phenyl acetate                     | 101-41-7    | t.i. | natural compound, flavors                                        |



|     |                                                           |                 |      |                                                                                         |
|-----|-----------------------------------------------------------|-----------------|------|-----------------------------------------------------------------------------------------|
| 9   | 3-ethoxyphenol                                            | 621-34-1        | t.i. | the degradation product of anisole, natural compound                                    |
| 9   | octanoic acid                                             | 124-07-2        | t.i. | disinfectant, synthesis of dyes, perfumes                                               |
| 9   | 1-phenoxy-2-propanol                                      | 770-35-4        | t.i. | solvent, cosmetics                                                                      |
| 9.1 | o-i-propoxyphenyl methylcarbamate                         | 114-26-1        | t.i. | insecticide                                                                             |
| 9.1 | 2-ethyl-2,3-dihydro-1H-indene                             | 56147-63-8      | t.i. | -                                                                                       |
| 9.1 | undecanoic acid                                           | 112-37-8        | t.i. | flavors                                                                                 |
| 9.1 | nonanoic acid                                             | 112-05-0        | t.i. | herbicidal formulations, disinfectant, cosmetics                                        |
| 9.1 | 3,3,4,4-tetramethylsuccinimide                            | 3566-61-8       | t.i. | chemical intermediate                                                                   |
| 9.1 | 1-decanol                                                 | 112-30-1        | t.i. | cosmetics, chemical intermediates, additive to plasticizers                             |
| 9.1 | 4,4-dimethyl-1,3-dioxane                                  | 766-15-4        | t.i. | plastic                                                                                 |
| 9.1 | caprolactam                                               | 105-60-2        | t.i. | polyamide fibers                                                                        |
| 9.1 | 2-propoxyphenol                                           | 6280-96-2       | t.i. | solvent                                                                                 |
| 9.2 | D-trans-1,2,2,3-tetramethylcyclopentane carboxylic acid   | 31147-56-5      | t.i. | -                                                                                       |
| 9.2 | 2-methyl-5-isopropylcyclohexanol                          | 60320-28-7      | t.i. | -                                                                                       |
| 9.2 | 3-hydroxydodecanoic acid                                  | 1883-13-2       | t.i. | -                                                                                       |
| 9.2 | N,N-diethylbutylamine                                     | 4444-68-2       | t.i. | -                                                                                       |
| 9.2 | neocarvomenthol                                           | 1126-40-5       | t.i. | -                                                                                       |
| 9.2 | delta-decalactone                                         | 705-86-2        | t.i. | flavors, fragrances                                                                     |
| 9.2 | triisopropyl phosphate                                    | 513-02-0        | t.i. | plastic additive                                                                        |
| 9.2 | 1,3-diisopropenylbenzene                                  | 3748-13-8       | t.i. | petroleum products                                                                      |
| 9.2 | dodecane                                                  | 112-40-3        | t.i. | petroleum products                                                                      |
| 9.3 | 1,2,3,4,5-pentamethylcyclopentane                         | *NIST<br>152797 | t.i. | -                                                                                       |
| 9.3 | karvomenton                                               | 499-70-7        | t.i. | flavors, fragrances                                                                     |
| 9.3 | 3-methylcaprolactam                                       | 2073-32-7       | t.i. | -                                                                                       |
| 9.3 | ethyl 2-methoxyimino-4-oxopentanoate                      | 82874-96-2      | t.i. | -                                                                                       |
| 9.3 | decanal                                                   | 112-31-2        | t.i. | flavors, cosmetics                                                                      |
| 9.3 | dimethyl methylcarbonodithioimide                         | 18805-25-9      | t.i. | pharmaceutical                                                                          |
| 9.3 | 2,4-dimethyl-2H-benzotriazole                             | -               | t.i. | herbicidal and antimicrobial preparations, decomposition of anti-corrosion preparations |
| 9.3 | methylparaben                                             | 99-76-3         | t.i. | preservative in food, beverage, cosmetics                                               |
| 9.3 | 1-heptadecanol                                            | 1454-85-9       | t.i. | lubricants, plasticizers                                                                |
| 9.4 | 4,7-dimethyl-3a, 4,7,7a-tetrahydro-2-benzofuran-1,3-dione | 2651-48-1       | t.i. | -                                                                                       |
| 9.4 | $\beta$ -Ionone                                           | 79-77-6         | t.i. | flavors, fragrances                                                                     |
| 9.4 | N,N-dibutylformamide                                      | 761-65-9        | t.i. | solvent                                                                                 |
| 9.4 | trimethylolpropane                                        | 77-99-6         | t.i. | chemical intermediate                                                                   |
| 9.4 | indol                                                     | 120-72-9        | t.i. | cosmetics, chemical intermediate                                                        |
| 9.4 | undecanal                                                 | 112-44-7        | t.i. | cosmetics, natural compound                                                             |
| 9.4 | 1-methylhydantoin                                         | 616-04-6        | t.i. | metabolite of pharmaceuticals                                                           |
| 9.4 | 1,2,3-benzenetricarboxylic acid                           | 569-51-7        | t.i. | a natural phenolic compound                                                             |
| 9.4 | 5-Methylhydantoin                                         | 616-03-5        | t.i. | natural compound, microbiological reactions                                             |
| 9.4 | 3,3a,4,6,7,7a-hexahydro-4,7-methano-5H-inden-5-one        | 14888-58-5      | t.i. | plastic                                                                                 |
| 9.4 | camphor                                                   | 76-22-2         | t.i. | plastic, pharmaceuticals, repelent, natural compound                                    |
| 9.4 | 2-undecanol                                               | 1653-30-1       | t.i. | admixture to other compounds                                                            |
| 9.4 | edulan                                                    | 41678-29-9      | t.i. | food                                                                                    |
| 9.4 | 2-mercaptopyridine                                        | 2637-34-5       | t.i. | pharmaceuticals                                                                         |
| 9.4 | 2-amino-5-nitrothiazole                                   | 121-66-4        | t.i. | pharmaceuticals                                                                         |
| 9.5 | 1-decalone                                                | 4832-16-0       | t.i. | -                                                                                       |
| 9.5 | N-ethyl-1,3-dimethylbutan-1-amine                         | 42966-64-3      | t.i. | -                                                                                       |
| 9.5 | isopropyl 4-oxovalerate                                   | 21884-26-4      | t.i. | flavors                                                                                 |

|      |                                                    |             |      |                                                                |
|------|----------------------------------------------------|-------------|------|----------------------------------------------------------------|
| 9.5  | 1-indanone                                         | 83-33-0     | t.i. | cigarette smoke, waste water                                   |
| 9.5  | 3-tert-butylphenol                                 | 585-34-2    | t.i. | pharmacy, fragrances                                           |
| 9.5  | 2-ethyl-1-butene                                   | 760-21-4    | t.i. | chemical intermediate                                          |
| 9.5  | 1-(4-propan-2-ylphenyl)propan-1-ol                 | 54518-11-5  | t.i. | chemical intermediate                                          |
| 9.5  | phenyl acetic acid                                 | 103-82-2    | t.i. | natural compound, flavors                                      |
| 9.5  | 2,4-decadienal                                     | 2363-88-4   | t.i. | oils, natural compound, flavors                                |
| 9.5  | N,N-dimethylbutan-2-amine                          | 921-04-0    | t.i. | surfactant                                                     |
| 9.5  | 1,2,3-trimethoxybenzene                            | 634-36-6    | t.i. | smoked food                                                    |
| 9.6  | ethyl cyclopropanecarboxylate                      | 4606-07-9   | t.i. | -                                                              |
| 9.6  | 2-hydroxypiperitone                                | 490-03-9    | t.i. | natural compound                                               |
| 9.6  | methyl 6-methylsalicylate                          | 33528-09-5  | t.i. | -                                                              |
| 9.6  | formanilide                                        | 103-70-8    | t.i. | analgesic, antipyretic                                         |
| 9.6  | 2,4,6-trichloroanisole                             | 87-40-1     | t.i. | metabolite of 2,4,6-trichlorophenol fungicide, product of mold |
| 9.6  | 5-methyl-1,2,3,4-tetrahydronaphthalene             | 2809-64-5   | t.i. | petroleum products                                             |
| 9.6  | camphor oxime                                      | 13559-66-5  | t.i. | natural compound                                               |
| 9.6  | 4,8-dimethyl-1-nonanol                             | 33933-80-1  | t.i. | natural compound, cosmetics                                    |
| 9.6  | tripropylene glycol                                | 1638-16-0   | t.i. | solvent, chemical intermediate                                 |
| 9.7  | n-(2,6-dimethylphenyl)formamide                    | 607-92-1    | t.i. | pharmaceutical                                                 |
| 9.7  | 2,6-dihydroxybenzoic acid                          | 303-07-1    | t.i. | microbiological processes                                      |
| 9.7  | 3-decen-1-ol (Z)                                   | 10340-22-4  |      | natural compound                                               |
| 9.7  | 2-methyl-1-indanone                                | 17496-14-9  | t.i. | tobacco smoke                                                  |
| 9.7  | 3,3-dimethyl-1-indanone                            | 26465-81-6  | t.i. | pharmaceuticals                                                |
| 9.8  | 1,2-dimethyl-2,3-dihydro-1H-indole                 | 26216-93-3  | t.i. | -                                                              |
| 9.8  | N-(2,6-dimethylphenyl)acetamide                    | 2198-53-0   | t.i. | -                                                              |
| 9.8  | 2,5-dihydroperoxy-2,5-dimethylhexane               | 3025-88-5   | t.i. | addition to polymers                                           |
| 9.8  | pinanediol                                         | 22422-34-0  | t.i. | chemical intermediate                                          |
| 9.8  | 1-(4-tert-butylphenyl)ethanol                      | 34386-42-0  | t.i. | cosmetics, flavors                                             |
| 9.9  | isopropylidenecyclohexane                          | 5749-72-4   | t.i. | -                                                              |
| 9.9  | N,N-dibutylacetamide                               | 1563-90-2   | t.i. | -                                                              |
| 9.9  | 4,4'-methylenediphenyl diisocyanate                | 116437-28-6 | t.i. | -                                                              |
| 9.9  | limonene glycol                                    | 1946-00-5   | t.i. | flavors                                                        |
| 9.9  | 4-hydroxybenzyl alcohol                            | 623-05-2    | t.i. | flavors                                                        |
| 9.9  | butyl octanoate                                    | 589-75-3    | t.i. | flavors, fragrances                                            |
| 9.9  | 4'-isopropylacetophenone                           | 645-13-6    | t.i. | cosmetics, flavors                                             |
| 9.9  | 2-(2-butoxyethoxy)ethyl acetate                    | 124-17-4    | t.i. | solvent, plasticizer                                           |
| 9.9  | ethinamate                                         | 126-52-3    | t.i. | pharmaceuticals                                                |
| 10   | 4-(2-propenyl)acetophenone                         | 5359-06-04  | t.i. | plastic, cosmetics                                             |
| 10   | 2-(hydroxymethyl)benzoic acid                      | 612-20-4    | t.i. | -                                                              |
| 10   | 2-cyclopentaneethanol                              | 766-00-7    | t.i. | -                                                              |
| 10   | phenylmalonic acid                                 | 2613-89-0   | t.i. | -                                                              |
| 10   | 3-hydroxybenzaldehyde                              | 100-83-4    | t.i. | food additive                                                  |
| 10   | 1-isopropyl-2,2-dimethyltrimethylene diisobutyrate | 6846-50-0   | t.i. | plasticizer                                                    |
| 10   | 3H-2-benzofuran-1-one                              | 87-41-2     | t.i. | natural compound                                               |
| 10.1 | 3,4-dimethylacetophenone                           | 3637-01-2   | t.i. | -                                                              |
| 10.1 | 2',5'-dimethyl acetophenone                        | 2142-73-6   | t.i. | -                                                              |
| 10.1 | 3-ethoxy-4-hydroxybenzaldehyde                     | 4230-32-4   | t.i. | -                                                              |
| 10.1 | 2-hydroxybenzaldehyde                              | 57732-90-8  | t.i. | -                                                              |
| 10.1 | 3-hydroxy-2,4,4-trimethylpentyl 2-methylpropanoate | 74367-34-3  | t.i. | -                                                              |
| 10.1 | 6,10-dimethylundecan-2-one                         | 1604-34-8   | t.i. | flavors, fragrances                                            |
| 10.1 | 5-chloro-2-methylbenzoxazole                       | 19219-99-9  | t.i. | chemical intermediate                                          |
| 10.1 | 6-tridecene                                        | 24949-38-0  | t.i. | petroleum products                                             |
| 10.1 | cuminaldehyde                                      | 122-03-2    | t.i. | natural compound                                               |

|      |                                                             |             |      |                                                                                          |
|------|-------------------------------------------------------------|-------------|------|------------------------------------------------------------------------------------------|
| 10.1 | (Z)-rose oxide                                              | 16409-43-1  | t.i. | natural compound                                                                         |
| 10.1 | 1-methyl-1H-benzotriazole                                   | 13351-73-0  | t.i. | the degradation of 1H-benzotriazole                                                      |
| 10.2 | 3-(trimethoxysilyl)-1-propanethiol                          | 36879-74-0  | t.i. | -                                                                                        |
| 10.2 | n-Tridecane                                                 | 629-50-5    | t.i. | petroleum products, solvent, chemical intermediate                                       |
| 10.2 | 4-hydroxybenzaldehyde                                       | 123-08-0    | t.i. | natural compound, biomass degradation                                                    |
| 10.3 | 3-fluoroacetanilide                                         | 351-28-0    | t.i. | -                                                                                        |
| 10.3 | undecanol                                                   | 112-42-5    | t.i. | flavor, additives, fragrances                                                            |
| 10.3 | thymol                                                      | 89-83-8     | t.i. | flavors, cosmetics                                                                       |
| 10.3 | 2-aminoacetophenone                                         | 551-93-9    | t.i. | chemical intermediate                                                                    |
| 10.3 | methyl decanoate                                            | 110-42-9    | t.i. | chemical intermediate                                                                    |
| 10.3 | 1-tetralone                                                 | 529-34-0    | t.i. | chemical intermediate, solvent                                                           |
| 10.3 | 3,4,5-trimethoxytoluene                                     | 6443-69-2   | t.i. | waste water                                                                              |
| 10.3 | 2,4,7,9-tetramethyldec-5-yne-4,7-diol                       | 126-86-3    | t.i. | wetting agent, FFS ingredient, antifoam, detergent ingredient                            |
| 10.3 | 5,5-dimethyl-1,3-cyclohexanedione                           | 126-81-8    | t.i. | decay of plastics                                                                        |
| 10.4 | cyclohexyl isopropyl phosphono fluoridate                   | 333416-55-0 | t.i. | -                                                                                        |
| 10.4 | 4-isopropyl- $\alpha,\alpha$ -dimethylbenzyl alcohol        | 3445-42-9   | t.i. | -                                                                                        |
| 10.4 | 4-tert-butylphenol                                          | 98-54-4     | t.i. | plastic additive                                                                         |
| 10.4 | 2-methyl quinoline                                          | 91-63-4     | t.i. | pharmaceutical, microbiological processes                                                |
| 10.4 | 1,3-diacetylbenzene                                         | 6781-42-6   | t.i. | pharmaceutical intermediate                                                              |
| 10.4 | dodecanal                                                   | 112-54-9    | t.i. | cosmetics                                                                                |
| 10.4 | para-tert-butyl acetophenone                                | 943-27-1    | t.i. | plastic, cosmetics                                                                       |
| 10.4 | 2-hydroxyethyl methacrylate                                 | 868-77-9    | t.i. | polymers                                                                                 |
| 10.4 | benzyl benzoate                                             | 120-51-4    | t.i. | repellent, fragrances, veterina                                                          |
| 10.4 | 2,6-diisopropylphenol                                       | 2078-54-8   | t.i. | pharmaceuticals                                                                          |
| 10.5 | 2-trifluoromethyl-nicotinamide                              | 959108-47-5 | t.i. | -                                                                                        |
| 10.5 | 3-tert-butyl-5-ethyltoluene                                 | 6630-01-9   | t.i. | -                                                                                        |
| 10.5 | allyl crotonate                                             | 20474-93-5  | t.i. | flavors                                                                                  |
| 10.5 | vanillin                                                    | 121-33-5    | t.i. | flavors, cosmetics                                                                       |
| 10.5 | tripropylene glycol monomethyl ether                        | 20324-33-8  | t.i. | colors, cleaners                                                                         |
| 10.5 | propyl tiglate                                              | 61692-83-9  | t.i. | natural compounds                                                                        |
| 10.6 | 4,5-diethyl-2,3-dimethyl-2,3-dihydrofuran                   | 54244-89-2  | t.i. | -                                                                                        |
| 10.6 | ethyl cyclopropane carboxylate                              | 4606-07-09  | t.i. | chemical intermediate                                                                    |
| 10.6 | 2,4-diethyl-6-methyl-1,3,5-trioxane                         | 117888-04-7 | t.i. | -                                                                                        |
| 10.6 | 5-hydroxy-3,3,6,6-tetramethyl-4-thiepanone                  | 4485-40-9   | t.i. | -                                                                                        |
| 10.6 | 3-(2-hydroxypropyl)-5-methyl-2-oxazolidinone                | 3375-84-6   | t.i. | -                                                                                        |
| 10.6 | 1,2-dihydro-2,2,4-trimethylquinoline                        | 147-47-7    | t.i. | antioxidant                                                                              |
| 10.6 | 2-ethylhexyl mercaptoacetate                                | 7659-86-1   | t.i. | chemical intermediate                                                                    |
| 10.6 | N-(2,5-dimethylphenyl)formamid                              | 10113-40-3  | t.i. | chemical intermediate                                                                    |
| 10.6 | 1,4-diacetylbenzene                                         | 1009-61-6   | t.i. | rubber mesh reagent                                                                      |
| 10.7 | 4'-isobutylacetophenone                                     | 38861-78-8  | t.i. | -                                                                                        |
| 10.7 | 4'-methylbutyrophenone                                      | 4160-52-5   | t.i. | chemical intermediate                                                                    |
| 10.7 | 3-phenyl propionic acid                                     | 501-52-0    | t.i. | chemical intermediate                                                                    |
| 10.7 | dicyclohexylamine                                           | 101-83-7    | t.i. | chemical intermediate, color, insecticide, anticorrosive agent, plasticizer, antioxidant |
| 10.7 | 1-octadecanol                                               | 112-92-5    | t.i. | cosmetics, chemical intermediate, perfumes, additives                                    |
| 10.7 | 2,2,6,7-tetramethyl-10-oxatricyclo[4.3.0.1(1,7)]decan-5-one | 121747-63-5 | t.i. | natural compound                                                                         |
| 10.7 | geranyl acetone                                             | 689-67-8    | t.i. | natural compound                                                                         |
| 10.7 | 1,4-dimethyl-1H-benzotriazole                               | -           | t.i. | benzotriazoles                                                                           |
| 10.7 | digitoxin                                                   | 71-63-6     | t.i. | pharmaceuticals                                                                          |

|      |                                                                    |             |      |                                                                     |
|------|--------------------------------------------------------------------|-------------|------|---------------------------------------------------------------------|
| 10.8 | 5-bromo-6-chloro-3-indolyl- $\beta$ -D-                            | 43125-89-9  | t.i. | -                                                                   |
| 10.8 | 3,3,6-trimethylbicyclo[3.1.0]hexan-2-one                           | 53966-40-8  | t.i. | -                                                                   |
| 10.8 | benzaldehyde propylene glycol acetal                               | 2568-25-4   | t.i. | flavors                                                             |
| 10.8 | 4-(decyloxy)benzoic Acid                                           | 5519-23-3   | t.i. | pharmaceutical                                                      |
| 10.8 | 2,4-dimethylquinoline                                              | 1198-37-4   | t.i. | tire, petroleum products                                            |
| 10.8 | 1,2-decanediol                                                     | 1119-86-4   | t.i. | chemical intermediate                                               |
| 10.8 | 3,3-dimethylphthalide                                              | 1689-09-4   | t.i. | chemical intermediate                                               |
| 10.8 | decanoic acid                                                      | 334-48-5    | t.i. | cosmetics, intermediat                                              |
| 10.8 | dimethyl phthalate                                                 | 131-11-3    | c.i. | plasticizer, solvent                                                |
| 10.8 | 3,3-dimethyl-1,5-ditert-butyl-bicyclo[3.1.0]hexan-4-one            | 19377-95-8  | t.i. | plastic                                                             |
| 10.9 | 2,3-dimethylbenzamide                                              | 5580-34-7   | t.i. | -                                                                   |
| 10.9 | methyl 12-methyltetradecanoate                                     | 5129-66-8   | t.i. | -                                                                   |
| 10.9 | 3,4-dihydro-8-methyl naphthalenone                                 | 51015-28-2  | t.i. | cosmetics                                                           |
| 10.9 | 1-dodecanol                                                        | 112-53-8    | t.i. | natural compound, flavors, cosmetics, detergents and wetting agents |
| 10.9 | 2,6-di-tert-butyl-1,4-benzoquinone                                 | 719-22-2    | t.i. | oxidizer, catalyst                                                  |
| 11   | (2-isothiocyanato methyl) -benzene                                 | 2257-02-09  | t.i. | natural compound                                                    |
| 11   | gamma-decalactone                                                  | 706-14-9    | t.i. | flavors                                                             |
| 11   | dicyclopentadiene diepoxide                                        | 81-21-0     | t.i. | addition of rubber, epoxy resins                                    |
| 11   | 1-[4-(2-hydroxypropan-2-yl)phenyl]ethanone                         | 54549-72-3  | t.i. | tire                                                                |
| 11   | alpha, alpha'-dihydroxy-1,3-diisopropylbenzene                     | 1999-85-5   | t.i. | chemical intermediate                                               |
| 11   | tetradecane                                                        | 629-59-4    | t.i. | petroleum products                                                  |
| 11   | 1H-benzotriazole                                                   | 95-14-7     | t.i. | anti-corrosion agents                                               |
| 11   | undecan-4-olide                                                    | 104-67-6    | t.i. | repellent                                                           |
| 11.1 | 6-methyl-3-(1-methylethyl)-2-oxo-1-(3-oxobutyl)                    | 22339-30-6  | t.i. | -                                                                   |
| 11.1 | decyl acetate                                                      | 112-17-4    | t.i. | flavors                                                             |
| 11.1 | 2-methylindole                                                     | 95-20-5     | t.i. | flavors, burning and pyrolysis of organic material                  |
| 11.1 | 2-tridecanone                                                      | 593-08-8    | t.i. | natural compound, flavors, cosmetics                                |
| 11.1 | tetraethylene glycol dimethyl ether                                | 143-24-8    | t.i. | solvent                                                             |
| 11.2 | 6-methyl-3(2H)-benzofuranone                                       | 20895-41-4  | t.i. | -                                                                   |
| 11.2 | butyl 2-butenate                                                   | 7299-91-4   | t.i. | -                                                                   |
| 11.2 | (2S)-1,2,3,4-tetrahydro-8-hydroxy-4-oxoquinoline-2-carboxylic acid | 4886-42-4   | t.i. | -                                                                   |
| 11.2 | tributyl phosphate                                                 | 126-73-8    | t.i. | plastic additive                                                    |
| 11.2 | 2-tridecanol                                                       | 1653-31-2   | t.i. | natural compound                                                    |
| 11.2 | tridecanal                                                         | 10486-19-8  | t.i. | natural compound, cosmetics                                         |
| 11.2 | 4'-aminopropiophenone                                              | 70-69-9     | t.i. | pesticide                                                           |
| 11.3 | 2,5-heptadecadion                                                  | 66408-88-6  | t.i. | -                                                                   |
| 11.3 | N-(2-phenylethyl)acetamide                                         | 877-95-2    | t.i. | -                                                                   |
| 11.3 | 4-isopropyl-phenetole                                              | 4132-79-0   | t.i. | -                                                                   |
| 11.3 | 3,5-diisopropyl-1,2,4-trithiolane                                  | 54934-99-5  | t.i. | flavors                                                             |
| 11.3 | tetrapropylene glycol, monomethyl ether                            | 20324-34-9  | t.i. | colors, cleaners                                                    |
| 11.3 | alpha, alpha'-dihydroxy-1,4-diisopropylbenzene                     | 2948-46-1   | t.i. | plastic additive                                                    |
| 11.3 | 2,6-diacetylpyridine                                               | 1129-30-2   | t.i. | chemical intermediate                                               |
| 11.3 | 4-isopropylaniline                                                 | 99-88-7     | t.i. | degradation product of herbicide isoproturon                        |
| 11.3 | 2-butyl-5-ethyl thiophene                                          | 54411-06-2  | t.i. | synthesis of arom                                                   |
| 11.4 | N, N-dicyclohexylmethylamine                                       | 7560-83-0   | t.i. | -                                                                   |
| 11.4 | N-metil dicikloheksilamin                                          | 7560-83-0   | t.i. | -                                                                   |
| 11.4 | isobutyl tiglate                                                   | 61692-84-0  | t.i. | flavors, natural compound                                           |
| 11.4 | cycluron                                                           | 2163-69-1   | t.i. | herbicide                                                           |
| 11.4 | 3-hydroxyphenyl benzoate                                           | 136-36-7    | t.i. | UV absorber                                                         |
| 11.5 | N- (4-pyridinylmethyl) -1H-indole-3-ethanamine                     | 900350-59-2 | t.i. | -                                                                   |

|      |                                                            |             |      |                                                                         |
|------|------------------------------------------------------------|-------------|------|-------------------------------------------------------------------------|
| 11.5 | 3,5-diethyl-4-imino-2,5-cyclohexadien-1-one                | 108451-26-9 | t.i. | the degradation product of chloroacetanilide herbicides                 |
| 11.5 | 2,2-bis(4-methoxyphenyl)acetic acid                        | 20797-56-2  |      | -                                                                       |
| 11.5 | ethyl 4-(2-hydroxyphenyl)-2,4-dioxobutanoate               | 4940-37-8   | t.i. | -                                                                       |
| 11.5 | 3-methylindole                                             | 83-34-1     | t.i. | pharmacy, food additive, cosmetics                                      |
| 11.6 | 3,4-dihydro-5-methyl naphthalenone                         | 6939-35-1   | t.i. | cosmetics                                                               |
| 11.6 | 4-methyl-1H-benzotriazole                                  | 29878-31-7  | t.i. | de-icing agent, anti-corrosion protection, fungicide                    |
| 11.7 | 1,2,3,4,4A, 8A-hexahydro-alpha, alpha, 4A-2-ol-lenmethanol | 29484-47-7  | t.i. | -                                                                       |
| 11.7 | 4-methyl-1-tetralone                                       | 19832-98-5  | t.i. | -                                                                       |
| 11.7 | 1,2,4-triazine-3,5(2H,4H)-dione,6-(1,1-dimethylethyl)      | 52236-30-3  | t.i. | -                                                                       |
| 11.7 | 6-ethyl-4,5-decanediol                                     | 22607-12-1  | t.i. | -                                                                       |
| 11.7 | ethyl 2-methyl-2-butenate                                  | 55514-48-2  | t.i. | flavors, fragrances                                                     |
| 11.7 | dihydroactinidiolide                                       | 15356-74-8  | t.i. | flavors, fragrances                                                     |
| 11.7 | 3-tert-butyl-4-hydroxyanisole                              | 121-00-6    | t.i. | food additive                                                           |
| 11.7 | lauric acid                                                | 143-07-7    | t.i. | general purpose chemical, cosmetics, , food additive                    |
| 11.7 | 2,5-diisobutyl thiophene                                   | 54845-33-9  | t.i. | cosmetics                                                               |
| 11.7 | alpha-selinene                                             | 473-13-2    | t.i. | natural compound                                                        |
| 11.7 | 5-hydroxyvanillin                                          | 3934-87-0   | t.i. | oxidation of lignin                                                     |
| 11.7 | dihydroactinidiolide                                       | 17092-92-1  | t.i. | a raw material for fragrances, a decomposition product of beta-carotene |
| 11.8 | 1-(2,4,6-trihydroxyphenyl)butan-1-one                      | 2437-62-9   | t.i. | -                                                                       |
| 11.8 | triethylene glycol monomethyl ether                        | 112-35-6    | t.i. | solvent, chemical intermediate, softener                                |
| 11.9 | 4-pentadecyl ester- 2,5-difluorobenzoic acid               | 900338-48-1 | t.i. | -                                                                       |
| 11.9 | decyl isopropylphosphonofluoridoate                        | 333416-36-7 | t.i. | -                                                                       |
| 11.9 | benzenesulfonamide                                         | 98-10-2     | t.i. | chemical intermediate                                                   |
| 11.9 | hexadecane                                                 | 544-76-3    | t.i. | petroleum products, solvent                                             |
| 11.9 | 2-chloro-4,6-diamino-1,3,5-triazinen                       | 3397-62-4   | t.i. | degradation product of herbicide atrazine and propazine                 |
| 11.9 | 2,6-dimethoxy-1,4-benzoquinone                             | 530-55-2    | t.i. | wood decomposition                                                      |
| 12   | 2,3,3-trimethyl-3H-indol-5-amine                           | 773-63-7    | t.i. | pharmaceutical intermediate                                             |
| 12   | nonadecane                                                 | 629-92-5    | t.i. | cosmetics, fragrances                                                   |
| 12   | isobutyl 3-methyl-2-butenate                               | 30434-54-9  | t.i. | cosmetics, natural compound                                             |
| 12   | pentadecane                                                | 629-62-9    | t.i. | petroleum products, chemical intermediate, solvent                      |
| 12   | diethyltoluamide                                           | 134-62-3    | t.i. | repellent                                                               |
| 12   | levetiracetam                                              | 102767-28-2 | t.i. | pharmaceuticals                                                         |
| 12.1 | 1-methylindole-2,3-dione                                   | 64605-28-3  | t.i. | -                                                                       |
| 12.1 | gabapentin                                                 | 60142-96-3  | t.i. | analgesic                                                               |
| 12.1 | 5,6-dimethyl-1,2,3-benzotriazole                           | 4184-79-6   | t.i. | anti-corrosion products, anti-icing preparations                        |
| 12.1 | α-murolene                                                 | 10208-80-7  | t.i. | flavors                                                                 |
| 12.1 | 1-phenylpent-1-en-3-one                                    | 3152-68-9   | t.i. | natural compound                                                        |
| 12.1 | guaiol                                                     | 489-86-1    | t.i. | natural terpene compound                                                |
| 12.1 | 1,4,7,10,13-pentaoxacyclopentadecane                       | 33100-27-5  | t.i. | pesticides                                                              |
| 12.2 | vinyl myristate                                            | 5809-91-6   | t.i. | -                                                                       |
| 12.2 | methyl dodecanoate                                         | 111-82-0    | t.i. | flavors, chemical intermediate                                          |
| 12.2 | 2,6-dimethylphenyl isocyanate                              | 28556-81-2  | t.i. | chemical intermediate                                                   |
| 12.2 | dodecyl acetate                                            | 112-66-3    | t.i. | natural compound                                                        |
| 12.3 | p-tert-butylpivalophenone                                  | 22583-66-0  | t.i. | -                                                                       |
| 12.3 | 3-acetamide-1-phenylpyrazole                               | 2753-56-2   | t.i. | -                                                                       |
| 12.3 | 4-(4-methylphenyl)-1H-1,2,3-triazole                       | 5301-96-2   | t.i. | -                                                                       |

|      |                                                             |             |      |                                                                            |
|------|-------------------------------------------------------------|-------------|------|----------------------------------------------------------------------------|
| 12.3 | 4-(methylsulfonyl)aniline                                   | 5470-49-5   | t.i. | -                                                                          |
| 12.3 | 5-ethyl-3,4-dihydro-1(2H)-naphthalenone                     | 51015-31-7  | t.i. | -                                                                          |
| 12.3 | tetradecanal                                                | 124-25-4    | t.i. | flavors, fragrances                                                        |
| 12.3 | 3,4,5-trimethoxybenzaldehyde                                | 86-81-7     | t.i. | pharmaceutical intermediate                                                |
| 12.3 | 3,3,6,8-tetramethyl-2,4-dihydronaphthalen-1-one             | 5409-55-2   | t.i. | petroleum products                                                         |
| 12.3 | myristyl alcohol                                            | 112-72-1    | t.i. | natural compound, component of fragrances, synthesis of myristyl myristate |
| 12.4 | oxacyclotetradeca-4-11-diyne                                | 6568-32-7   | t.i. | -                                                                          |
| 12.4 | dihydrojasnone                                              | 1128-08-1   | t.i. | flavors, fragrances                                                        |
| 12.4 | (2-acetylphenyl) formamide                                  | 5257-06-7   | t.i. | natural compound, biomass degradation                                      |
| 12.4 | 1-pentadecanol                                              | 629-76-5    | t.i. | plasticizer, emulsifier                                                    |
| 12.5 | 5-methyl-1H-benzotriazole                                   | 136-85-6    | t.i. | anti-corrosion products                                                    |
| 12.5 | o-toluenesulfonamide                                        | 88-19-7     | t.i. | plasticizer, chemical intermediate                                         |
| 12.6 | 2-acetylphenyl-formamide                                    | 900305-65-7 | t.i. | -                                                                          |
| 12.6 | 2-butyl-5-isobutyl thiophene                                | 54845-35-1  | t.i. | -                                                                          |
| 12.6 | 6,7-dimethyl-1-tetralone                                    | 19550-57-3  | t.i. | -                                                                          |
| 12.6 | dioctyl ether                                               | 629-82-3    | t.i. | chemical intermediate, plasticizer, solvent                                |
| 12.6 | ibuprofen                                                   | 15687-27-1  | t.i. | pharmaceuticals                                                            |
| 12.7 | propylene carbonate anhydrous                               | 91143-32-7  | t.i. | -                                                                          |
| 12.7 | desisopropylatrazine                                        | 1007-28-9   | c.i. | metabolite of atrazine                                                     |
| 12.7 | izoaromadendren epoksid                                     | NIST159366  | t.i. | natural compound                                                           |
| 12.7 | 2(3H)-benzofuranone                                         | 16778-27-1  | t.i. | natural terpenoid compound                                                 |
| 12.7 | diethylene glycol dimethacrylate                            | 2358-84-1   | t.i. | plastic                                                                    |
| 12.8 | benzophenone                                                | 119-61-9    | t.i. | fragrances, UV absorber, chemical intermediate                             |
| 12.8 | $\beta$ -eudesmol                                           | 473-15-4    | t.i. | natural compound                                                           |
| 12.8 | triallylisocyanurate                                        | 1025-15-6   | t.i. | plastic                                                                    |
| 12.9 | 2,6,10-trimethyl-1,5,9-undecatriene                         | 62951-96-6  | t.i. | -                                                                          |
| 12.9 | 5,9-dimethyl-2- (1-methylethyl) cyclodecane-1,4-dione       | 38230-97-6  | t.i. | -                                                                          |
| 12.9 | 3-methylideneundecane                                       | 71138-64-2  | t.i. | chemical intermediate, natural compound                                    |
| 12.9 | globulol                                                    | 51371-47-2  | t.i. | natural compound                                                           |
| 12.9 | a-bisabolol                                                 | 515-69-5    | t.i. | natural compound, cosmetics                                                |
| 13   | tetradecanol                                                | 343217-72-1 | t.i. | -                                                                          |
| 13   | p-toluenesulfonamide                                        | 70-55-3     | t.i. | fungicide, coatings, chemical intermediate                                 |
| 13   | 4-heptadecanone                                             | 53685-77-1  | t.i. | chemical intermediate                                                      |
| 13   | 5-methoxytryptamine                                         | 608-07-1    | t.i. | chemical intermediate, hypnotic and sedative enhancer                      |
| 13   | 8-heptadecene                                               | 16369-12-3  | t.i. | natural compound, cosmetics                                                |
| 13   | diethyl phthalate                                           | 84-66-2     | c.i. | plasticizer                                                                |
| 13   | desethylatrazine                                            | 6190-65-4   | c.i. | degradation product of herbicide atrazine                                  |
| 13.1 | ethyl 4-(4-methoxyphenyl)-2,4-dioxobutanoate                | 35322-20-4  | t.i. | -                                                                          |
| 13.1 | beta-methyl ionone                                          | 127-43-5    | t.i. | food additive                                                              |
| 13.1 | desethylterbuthylazine                                      | 30125-63-4  | c.i. | degradation product of herbicide terbuthylazine                            |
| 13.2 | isopropyl laurate                                           | 10233-13-3  | t.i. | -                                                                          |
| 13.2 | gamma-dodecalactone                                         | 2305-05-7   | t.i. | flavors, fragrances                                                        |
| 13.2 | 2-pentadecanol                                              | 1653-34-5   | t.i. | natural compound, cosmetics                                                |
| 13.2 | methylphenylchloridazon                                     | 17254-80-7  | t.i. | degradation product of herbicide chloridazon                               |
| 13.3 | 2-pentadecanone                                             | 2345-28-0   | t.i. | flavors, fragrances                                                        |
| 13.3 | heptadecane                                                 | 629-78-7    | t.i. | petroleum products, natural compound                                       |
| 13.3 | 3,3,6,8-tetramethyl-2,4-dihydronaphthalen-1-one             | 5409-55-2   | t.i. | decomposition of oil                                                       |
| 13.3 | 2-ethylhexyl benzoate                                       | 5444-75-7   | t.i. | solvent, cosmetics                                                         |
| 13.4 | octahydro-4,8,8,9-tetramethyl-1,4-methanoazulen-7 (1H) -one | 18319-28-3  | t.i. | -                                                                          |

|      |                                                                               |             |      |                                                              |
|------|-------------------------------------------------------------------------------|-------------|------|--------------------------------------------------------------|
| 13.4 | 3-methyl-3-heptanol                                                           | 5582-82-1   | t.i. | decomposition of organic materials                           |
| 13.5 | E)-4-(3-hydroxy-1,5,5-trimethyl-7-oxabicyclo[4.1.0]heptan-6-yl)but-3-en-2-one | 38274-01-0  | t.i. | -                                                            |
| 13.5 | hexadecanal                                                                   | 629-80-1    | t.i. | natural compound, cosmetics                                  |
| 13.6 | 2- (N-dimethyl-thiocarbamoylthio) -cyclopentanone                             | 23839-30-7  | t.i. | -                                                            |
| 13.6 | 3,5-di-tert-butylcatechol                                                     | 1020-31-1   | t.i. | -                                                            |
| 13.6 | 4-hydroxy-3,5-di-tert-butyl-2,4-cyclohexadien-1-one                           | 54965-43-4  | t.i. | -                                                            |
| 13.8 | N-propylbenzoate                                                              | 2315-68-6   | t.i. | cosmetics, flavors, fragrances                               |
| 13.9 | simazine                                                                      | 122-34-9    | c.i. | herbicide                                                    |
| 14   | 1-tridecanol                                                                  | 112-70-9    | t.i. | chemical intermediate                                        |
| 14   | 2-dodecenal                                                                   | 4826-62-4   | t.i. | natural compound                                             |
| 14   | 2,6-dichlorobenzamide                                                         | 2008-58-4   | c.i. | degradation product of herbicide 2,6-dichlorobenzonitrile    |
| 14.1 | 4,4-diphenyl-2-pentyne                                                        | 54372-84-8  | t.i. | -                                                            |
| 14.1 | 7a-methyl-3-methylidene-4,5,6,7-tetrahydro-3aH-benzofuran-2-one               | 67498-53-7  | t.i. | -                                                            |
| 14.1 | octahydro-4a (2H) -oxygenylmethanol                                           | 99992-19-5  | t.i. | -                                                            |
| 14.1 | 2,5-di-tert-amylhydroquinone                                                  | 79-74-3     | t.i. | antioxidant, gum supplement                                  |
| 14.1 | dichloro[1,7,7-trimethylbicyclo[2.2.1]heptan-2-yl]phosphine                   | 74630-16-3  | t.i. | pharmaceutical intermediate                                  |
| 14.1 | atrazine                                                                      | 1912-24-9   | c.i. | herbicide                                                    |
| 14.1 | dodecanamide                                                                  | 1120-16-7   | t.i. | cosmetics, plastic                                           |
| 14.2 | 3,5-di-tert-butyl-4-hydroxybenzaldehyde                                       | 1620-98-0   | t.i. | pharmaceutical intermediate                                  |
| 14.2 | propazine                                                                     | 139-40-2    | c.i. | herbicide                                                    |
| 14.2 | (Z)-pentatriacont-17-ene                                                      | 6971-40-0   | t.i. | cosmetics                                                    |
| 14.2 | alpha-copaene-11-ol                                                           | 41370-56-3  | t.i. | natural compound                                             |
| 14.2 | myristic acid                                                                 | 544-63-8    | t.i. | natural compound                                             |
| 14.3 | 4-[(4-amino-m-tolyl)amino]phenol                                              | 6219-89-2   | t.i. | -                                                            |
| 14.3 | octyl octanoate                                                               | 2306-88-9   | t.i. | flavors, fragrances                                          |
| 14.3 | 2-geranylphenol                                                               | 10232-02-7  | t.i. | natural compound                                             |
| 14.4 | (4-butyl-cyclohex-1-enyl)-benzonitrile                                        | 72114-68-2  | t.i. | -                                                            |
| 14.4 | 2-nonadecanone                                                                | 629-66-3    | t.i. | natural compound                                             |
| 14.5 | terbutylazine                                                                 | 5915-41-3   | c.i. | herbicide                                                    |
| 14.5 | triallyl cyanurate                                                            | 101-37-1    | t.i. | chemical intermediate, plastic                               |
| 14.6 | isopropyl 2-butenolate                                                        | 18060-77-0  | t.i. | natural compound                                             |
| 14.6 | N-butylbenzenesulphonamide                                                    | 3622-84-2   | c.i. | plasticizer, chemical intermediate, chlorobenzene metabolite |
| 14.6 | tris(2-chloro-1-methylethyl) phosphate                                        | 13674-84-5  | t.i. | plastic                                                      |
| 14.7 | 1,4,7,10,13,16-hexaoxacyclooctadecane                                         | 17455-13-9  | t.i. | -                                                            |
| 14.8 | octahydroacridine                                                             | 1658-08-8   | t.i. | pyrolysis reactions                                          |
| 15   | 8,9b-dimethyl-4a,9b-dihydrodibenzo[b,d]furan-3(4H)-one                        | 546-24-7    | t.i. | -                                                            |
| 15.1 | 2-azacyclotridecanone                                                         | 947-04-6    | t.i. | food additive                                                |
| 15.1 | benzil                                                                        | 134-81-6    | t.i. | chemical intermediate                                        |
| 15.2 | 1H-indole-2,3-dione                                                           | 91-56-5     | t.i. | colors, chemical intermediate                                |
| 15.2 | (4-ethylphenyl)-phenylmethanone                                               | 18220-90-1  | t.i. | chemical intermediate                                        |
| 15.2 | isopropyl myristate                                                           | 110-27-0    | t.i. | cosmetics, textile additive                                  |
| 15.2 | phytol                                                                        | 150-86-7    | t.i. | natural compound                                             |
| 15.3 | hexaethylene glycol dimethyl ether                                            | 1072-40-8   | t.i. | plastic, solvent                                             |
| 15.4 | 3,7,11,15-tetramethyl-2-hexadecen-1-ol                                        | 102608-53-7 | t.i. | natural compound                                             |
| 15.5 | 1,4,7,10,13,16,19-heptaoxacycloheneicosan-2-one                               | 83410-52-0  | t.i. | -                                                            |
| 15.5 | corymbolone                                                                   | 97094-19-4  | t.i. | -                                                            |
| 15.5 | 1-methoxy-2-phenoxybenzene                                                    | 1695-04-1   | t.i. | natural compound                                             |
| 15.6 | ethylene glycol dimethacrylate                                                | 97-90-5     | t.i. | polymers                                                     |

|      |                                                                        |             |      |                                                 |
|------|------------------------------------------------------------------------|-------------|------|-------------------------------------------------|
| 15.7 | hexadecennitrile                                                       | 88592-11-4  | t.i. | -                                               |
| 15.7 | 9E-hexadecen-1-ol                                                      | 64437-47-4  | t.i. | insect pheromone                                |
| 15.7 | benzene-1,4-dicarboxaldehyde                                           | 623-27-8    | t.i. | chemical intermediate                           |
| 15.7 | hexahydrofarnesyl acetone                                              | 502-69-2    | t.i. | natural insecticide                             |
| 15.7 | diisobutyl phthalate                                                   | 84-69-5     | t.i. | plasticizer                                     |
| 15.7 | caffeine                                                               | 58-08-2     | c.i. | urban waste water                               |
| 15.8 | 2,3,3-trimethyl-1-thia-3-silacyclohexane,                              | 88820-74-0  | t.i. | -                                               |
| 15.8 | tetraethylene glycol dimethacrylate                                    | 109-17-1    | t.i. | plastic                                         |
| 15.8 | desaminometribuzin                                                     | 35045-02-4  | t.i. | the degradation product of herbicide metribuzin |
| 15.8 | triethylene glycol dimethacrylate                                      | 109-16-0    | t.i. | dental materials, contact lenses                |
| 15.9 | nonadec-9-ene                                                          | 31035-07-1  | t.i. | -                                               |
| 15.9 | pentadecanoic acid                                                     | 1002-84-2   | t.i. | -                                               |
| 15.9 | antipyrine                                                             | 60-80-0     | t.i. | analgesic                                       |
| 15.9 | 2,4-dimethoxyphenyl isothiocyanate                                     | 33904-03-9  | t.i. | chemical intermediate                           |
| 16   | 1-nonadecene                                                           | 18435-45-5  | t.i. | petroleum products                              |
| 16   | tetra(ethylene glycol) bis(2-ethylhexanoate)                           | 18268-70-7  | t.i. | plasticizer                                     |
| 16   | hexadecanenitrile                                                      | 629-79-8    | t.i. | pyrolysis product                               |
| 16   | mebicar                                                                | 10095-06-4  | t.i. | pharmaceuticals                                 |
| 16   | trans-1-methoxy-3-trimethylsiloxy-1,3-butadiene<br>95                  | 38913-02-9  | t.i. |                                                 |
| 16.1 | methyl 9(E)-hexadecenoate                                              | 10030-74-7  | t.i. | natural compound                                |
| 16.2 | 3-benzylpentane-2,4-dione                                              | 1134-87-8   | t.i. | -                                               |
| 16.3 | metribuzin                                                             | 21087-64-9  | c.i. | herbicide                                       |
| 16.4 | 2-heptadecanone                                                        | 2922-51-2   | t.i. | natural compound                                |
| 16.4 | dechlorometazachlor                                                    | -           | t.i. | degradation product of herbicide metazachlor    |
| 16.5 | 4,5,9,10-dehydroisolongifolene                                         | 156747-45-4 | t.i. | natural compound                                |
| 16.5 | 7,9-di-tert-butyl-1-oxaspiro[4.5]deca-6,9-diene-<br>2,8-dione          | 82304-66-3  | t.i. | plastic                                         |
| 16.6 | 3,4-dimethylbenzophenone                                               | 2571-39-3   | t.i. | chemical intermediate                           |
| 16.6 | palmitoleic acid methyl ester                                          | 1120-25-8   | t.i. | natural compound                                |
| 16.7 | prometryn                                                              | 7287-19-6   | c.i. | herbicide                                       |
| 16.8 | methyl palmitate                                                       | 112-39-0    | t.i. | chemical intermediate                           |
| 17   | N- (1,4-dihydro-2,2-dimethyl-4-oxo-3 (2H) -<br>quinazoline) -acetamide | 309732-49-8 | t.i. | -                                               |
| 17   | (Z)-11-hexadecenoic acid                                               | 2416-20-8   | t.i. | natural compound                                |
| 17   | pentaethylene glycol monomethyl ether                                  | 23778-52-1  | t.i. | solvent, plastic additive                       |
| 17.1 | N-acetyltyramine                                                       | 1202-66-0   | t.i. | pharmaceuticals                                 |
| 17.2 | 1-hexadecanol                                                          | 36653-82-4  | t.i. | emulsifier, cosmetics                           |
| 17.2 | 5-methoxygramine                                                       | 16620-52-3  | t.i. | pharmaceutical intermediate                     |
| 17.2 | terbutryn                                                              | 886-50-0    | c.i. | herbicide                                       |
| 17.3 | 1,2,2-trimethylbutyl)cyclohexane                                       | 61142-21-0  | t.i. | -                                               |
| 17.3 | dibutyl phthalate                                                      | 84-74-2     | c.i. | plasticizer                                     |
| 17.4 | palmitic acid                                                          | 57-10-3     | t.i. | emulsions, polymer coatings, food               |
| 17.4 | 9-hexadecenoic acid                                                    | 2091-29-4   | t.i. | natural compound, oils                          |
| 17.4 | propyphenazone                                                         | 479-92-5    | c.i. | pharmaceuticals                                 |
| 17.5 | bromacil                                                               | 314-40-9    | t.i. | herbicide                                       |
| 17.7 | metalaxyl                                                              | 57837-19-1  | c.i. | herbicide                                       |
| 17.7 | metolachlor                                                            | 51218-45-2  | c.i. | herbicide                                       |
| 17.8 | lidocaine                                                              | 137-58-6    | t.i. | pharmaceuticals                                 |
| 18.2 | 1,3,5-tri-tert-butylbenzene                                            | 1460-02-2   | t.i. | plastic                                         |
| 18.4 | 1,2-bis-(2'-hydroxyphenyl)ethane                                       | 29338-20-3  | t.i. | -                                               |
| 18.5 | (4-isopropyl-phenyl)-phenyl-methanone                                  | 18864-76-1  | t.i. | -                                               |
| 18.6 | 4-hydroxy-5,6-epoxy beta ionone                                        | 900108-78-1 | t.i. | -                                               |
| 18.6 | 8-propoxycedrane                                                       | 19870-75-8  | t.i. | tobacco smoke                                   |



|      |                                                           |                 |      |                                                      |
|------|-----------------------------------------------------------|-----------------|------|------------------------------------------------------|
| 18.6 | aminophenazone                                            | 58-15-1         | t.i. | pharmaceuticals                                      |
| 18.7 | 2,2,4,4,6,8,8-heptamethylnonane                           | 4390-04-9       | t.i. | decomposition of oil                                 |
| 18.8 | bufencarb                                                 |                 | t.i. | insecticide                                          |
| 18.8 | 5-phenyl-1,3-thiazole-2,4-diamine                         | 490-55-1        | t.i. | pharmaceuticals                                      |
| 19   | 4-O-acetyl-3-methoxy-oylene-1,4-diol                      | 116461-66-6     | t.i. | -                                                    |
| 19   | 2,5-di-ter-butyl-1,4-benzoquinon                          | 2460-77-7       | t.i. | pharmaceutical intermediate                          |
| 19.1 | metazachlor                                               | 67129-08-2      | c.i. | herbicide                                            |
| 19.1 | carbamazepine-M (formyl acridine)                         | -               | t.i. | metabolite of carbamazepine                          |
| 19.2 | arachidonic acid                                          | 506-32-1        | t.i. | natural compound                                     |
| 19.6 | 4-(hexyloxy)-1-butanol                                    | 4541-13-3       | t.i. | -                                                    |
| 19.6 | cyclooctasulfur                                           | 10544-50-0      | t.i. | oil, tires, sulfate reduction                        |
| 19.7 | 1, 13-tridecanediol diacetate                             | 42236-70-4      | t.i. | -                                                    |
| 19.7 | methyl oleate                                             | 112-62-9        | t.i. | natural compound                                     |
| 19.8 | 3-methyl-1-penten-3-ol                                    | 918-85-4        | t.i. | -                                                    |
| 19.9 | stearoyl chloride                                         | 112-76-5        | t.i. | chemical intermediate                                |
| 20   | phenobarbital                                             | 50-06-6         | t.i. | pharmaceuticals                                      |
| 20.3 | bis(2-ethylhexyl) phthalate                               | 131-18-0        | t.i. | plasticizer                                          |
| 20.6 | cedrol                                                    | 77-53-2         | t.i. | flavors, fragrances                                  |
| 20.6 | gibberellin A9                                            | 427-77-0        | t.i. | natural fungicide                                    |
| 20.9 | methyl stearate                                           | 112-61-8        | t.i. | chemical intermediate, cosmetics                     |
| 21.3 | 2,5-bis(trifluoromethyl)bromobenzene                      | 15674-93-8      | t.i. | -                                                    |
| 21.3 | heptan-4-ol                                               | 7316-84-9       | t.i. | -                                                    |
| 21.3 | oleic acid                                                | 112-80-1        | t.i. | general purpose chemical, natural compound           |
| 21.3 | hexahydro-1H-pyrrolizine-3,5-dione                        | 18356-28-0      | t.i. | pharmaceuticals                                      |
| 21.5 | dihydrophytol                                             | 645-72-7        | t.i. | natural compound                                     |
| 21.5 | octadec-1-ene                                             | 112-88-9        | t.i. | solvent, chemical intermediate                       |
| 21.6 | stearic acid                                              | 57-11-4         | t.i. | chemical intermediate, cosmetics, pharmacy           |
| 21.8 | methyl 3-(diphenylphosphanyl)propanoate                   | 76734-29-7      | t.i. | -                                                    |
| 21.8 | bisphenol A                                               | 80-05-7         | t.i. | plastic additive, antioxidant                        |
| 21.9 | hexadecanamide                                            | 629-54-9        | t.i. | plastic additive                                     |
| 22   | tributyl citrate                                          | 77-94-1         | t.i. | plasticizer, surfactant                              |
| 22.1 | butyl hexadecanoate                                       | 111-06-8        | t.i. | cosmetics, food additive                             |
| 22.3 | mephenoxalone                                             | 70-07-5         | t.i. | medicine                                             |
| 22.4 | 11(Z)-octadecenoic acid                                   | 506-17-2        | t.i. | natural compound                                     |
| 22.5 | triethylene glycol bis(2-ethylhexanoate)                  | 94-28-0         | t.i. | plasticizer                                          |
| 22.6 | octaethylene glycol                                       | 5117-19-1       | t.i. | food additive, plasticizer                           |
| 22.9 | 3,6,9,12,15-pentaoxonadecan-1-ol                          | 1786-94-3       | t.i. | chemical intermediate, solvent, addition to polymers |
| 22.9 | 1-heptadecanol                                            | 822-20-8        | t.i. | natural compound                                     |
| 23.1 | 1,8-diazacyclotetradecane-2,7-dione                       | 4266-66-4       | t.i. | -                                                    |
| 23.3 | cis-9-octadecen-1-ol                                      | 143-28-2        | t.i. | cosmetics, natural compound                          |
| 23.5 | tributyl o-acetylcitrate                                  | 77-90-7         | t.i. | plasticizer, flavours                                |
| 23.6 | 1,8-diazacyclotetradecane-2,9-dione                       | 5776-79-4       | t.i. | -                                                    |
| 24.7 | metolachlor-M m/z 162,282                                 | -               | t.i. | degradation product of herbicide metolachlor         |
| 24.8 | nifedipine metabolite artifact                            | 99982-48-6      | t.i. | thermal decay of the metabolite of nifedipine        |
| 25.3 | tris(1,3-dichloro-2-propyl) phosphate                     | 13674-87-8      | t.i. | plasticizer, a flame retardant in plastic            |
| 25.4 | 2-[2-[2-[2-(2-methoxy methoxy)metoxi]metoxi]metoxi]etanol | *NIST<br>352040 | t.i. | lubricants, plasticizer, cosmetics                   |
| 25.6 | methyl ester-11,14-eicosadienoic acid                     | 2463-02-7       | t.i. | natural compound                                     |
| 25.7 | linoleic acid                                             | 60-33-3         | t.i. | emulsions, polymer coatings, food                    |
| 25.7 | carbamazepine                                             | 298-46-4        | c.i. | pharmaceuticals                                      |
| 25.7 | 4-methylaminoantipyrine hydrochloride                     | 519-98-2        | t.i. | pharmaceuticals                                      |
| 25.9 | N-lauroyl-DL-homoserine lactone                           | 18627-38-8      | t.i. | -                                                    |
| 26.4 | tebuconazole                                              | 107534-96-3     | t.i. | fungicide                                            |

|      |                                                                                      |             |      |                                                            |
|------|--------------------------------------------------------------------------------------|-------------|------|------------------------------------------------------------|
| 26.7 | butyl stearate                                                                       | 123-95-5    | t.i. | flavor, additives                                          |
| 27   | tris(2-butoxyethyl) phosphate                                                        | 78-51-3     | t.i. | plasticizer                                                |
| 27.1 | bis(2-ethylhexyl) adipate                                                            | 103-23-1    | t.i. | cosmetics                                                  |
| 27.4 | tetrateetracontane                                                                   | 7098-22-8   | t.i. | -                                                          |
| 27.7 | $\alpha$ -curcumene                                                                  | 644-30-4    | t.i. | natural compound                                           |
| 27.9 | pentadecanal                                                                         | 2765-11-9   | t.i. | natural compound                                           |
| 28.8 | dodecaethylene glycol                                                                | 6790-09-6   | t.i. | plasticizer                                                |
| 28.9 | 6-tert-butyl-1,1-dimethyl-2,3-dihydro-1H-inden-4-yl)acetic acid                      | 55591-05-4  | t.i. | -                                                          |
| 28.9 | 14-isopropyl-podocarpa-8,11,13-triene-7,13-diol                                      | 24338-19-0  | t.i. | -                                                          |
| 29   | 4-hydroxybutyl acrylate                                                              | 55134-10-6  | t.i. | -                                                          |
| 29.3 | dibutylamin                                                                          | 111-92-2    | t.i. | -                                                          |
| 29.5 | 8-hexylpentadecane                                                                   | 13475-75-7  | t.i. | natural compound                                           |
| 29.8 | diisooctyl phthalate                                                                 | 27554-26-3  | t.i. | plasticizer                                                |
| 29.8 | mono-ethylhexyl ester                                                                | 4376-20-9   | t.i. | plasticizer                                                |
| 29.9 | bis(2-ethylhexyl) phthalate                                                          | 117-81-7    | c.i. | plasticizer                                                |
| 30.9 | triphenylphosphine oxide                                                             | 791-28-6    | t.i. | pharmaceutical intermediate                                |
| 31.1 | tetradecyl dodecanoate                                                               | 22412-97-1  | t.i. | cosmetics                                                  |
| 31.2 | nandrolone                                                                           | 434-22-0    | t.i. | pharmaceuticals                                            |
| 31.4 | di-n-octyl phthalate                                                                 | 117-84-0    | t.i. | plasticizer                                                |
| 32.6 | 16-heptadecenal                                                                      | 900144-57-9 | t.i. | -                                                          |
| 33.3 | 2,4-bis( $\alpha,\alpha$ -dimethylbenzyl)phenol                                      | 2772-45-4   | t.i. | antioxidant, plastic additive                              |
| 34.4 | bis(2-ethylhexyl) isophthalate                                                       | 137-89-3    | t.i. | plastic additive                                           |
| 35.2 | cis-9,10-octadecenoamide                                                             | 301-02-0    | t.i. | additive to reduce wear and tear on polyethylene expansion |
| 35.5 | celecoxib                                                                            | 169590-42-5 | t.i. | pharmaceuticals                                            |
| 35.7 | octacosane                                                                           | 630-02-4    | t.i. | -                                                          |
| 35.8 | octadecanamide                                                                       | 124-26-5    | t.i. | chemical intermediate, corrosion inhibitor                 |
| 36.1 | squalene                                                                             | 7683-64-9   | t.i. | natural compound                                           |
| 36.3 | 16 $\alpha$ -tert.-butyl- $\Delta$ 5-androstenol-(3 $\beta$ )-on-(17)-halbmethanolat | 55162-58-8  | t.i. | steroid                                                    |
| 36.5 | 27-nor-25-ketocholesterol                                                            | 7494-34-0   | t.i. | intermediat                                                |
| 38.5 | 2-methyloctadecane                                                                   | 1560-88-9   | t.i. | petroleum products                                         |
| 38.9 | cholesta-3,5-diene                                                                   | 747-90-0    | t.i. | steroid, natural compound                                  |
| 39.1 | n-octanoic anhydride                                                                 | 623-66-5    | t.i. | -                                                          |
| 39.2 | praziquantel                                                                         | 55268-74-1  | t.i. | pharmaceuticals                                            |
| 39.3 | 1-heptacosanol                                                                       | 2004-39-9   | t.i. | natural compound                                           |
| 41.3 | 1,4-butanediol diglycidyl ether                                                      | 2425-79-8   | t.i. | chemical intermediate                                      |
| 41.8 | cholesterol                                                                          | 57-88-5     | t.i. | hormone, slurry, septic tanks, sewage                      |
| 41.9 | loratadine                                                                           | 79794-75-5  | t.i. | pharmaceuticals                                            |
| 44.3 | 4-cholesten-3-one                                                                    | 601-57-0    | t.i. | steroid, slurry, septic tanks, sewage                      |
| 45.2 | stigmasterol                                                                         | 83-48-7     | t.i. | steroid, slurry, septic tanks, sewage                      |
| 45.3 | gamma-sitosterol                                                                     | 83-47-6     | t.i. | steroid                                                    |
| 45.8 | dilaurin                                                                             | 17598-94-6  | t.i. | natural compound, food                                     |
| 47.5 | palmityl palmitate                                                                   | 540-10-3    | t.i. | natural compound                                           |
| 48.4 | olean-12-en-3-one                                                                    | 638-97-1    | t.i. | -                                                          |
| 49.2 | beta-amyirin                                                                         | 559-70-6    | t.i. | natural triterpene compound                                |
| 49.8 | 2,6,10,15,19,23-hexamethyl-tetracos-2,10,14,18,22-pentaene-6,7-diol                  | *NIST194707 | t.i. | natural compound                                           |
